REVIEW PAPER

# Spatial and temporal integration of signalling networks regulating pollen tube growth

Laura Zonia\*

University of Amsterdam, Swammerdam Institute for Life Sciences, Section of Plant Physiology, Kruislaan 904, 1098 XH Amsterdam, The Netherlands

\* To whom correspondence should be addressed. E-mail: l.e.zonia@uva.nl

Received 5 January 2010; Revised 8 March 2010; Accepted 9 March 2010

## Abstract

**The overall function of a cell is determined by its contingent of active signal transduction cascades interacting on multiple levels with metabolic pathways, cytoskeletal organization, and regulation of gene expression. Much work has been devoted to analysis of individual signalling cascades interacting with unique cellular targets. However, little is known about how cells integrate information across hierarchical signalling networks. Recent work on pollen tube growth indicates that several key signalling cascades respond to changes in cell hydrodynamics and apical volume. Combined with known effects on cytoarchitecture and signalling from other cell systems, hydrodynamics has the potential to integrate and synchronize the function of the broader signalling network in pollen tubes. This review will explore recent work on cell hydrodynamics in a variety of systems including pollen, and discuss hydrodynamic regulation of cell signalling and function including exocytosis and endocytosis, actin cytoskeleton reorganization, cell wall deposition and assembly, phospholipid and inositol polyphosphate signalling, ion flux, small G-proteins, fertilization, and self-incompatibility. The combined data support a newly emerging model of pollen tube growth.**

**Key words:** Cell hydrodynamics, cell wall, cytoskeleton, endocytosis, exocytosis, fertilization, GTPases, ion flux, lipid signalling, polyphosphoinositides.

## Introduction

At any given moment, the readout of cell function or behaviour is a composite of events occurring at different scales—from the level of quantum noise through atomic, molecular, and structural levels. Cells utilize signal transduction cascades to relay information across different scales and from the cell periphery to the interior. Many cellular behaviours, such as pollen tube growth, are orchestrated by multiple signals interacting in a broader signalling network. Order is achieved by integration of these signalling networks with metabolic pathways, morphological and structural rearrangements, and gene expression profiles. Considerable work has been invested in understanding the regulation of individual signal transduction cascades. However, little is known about how cells integrate, regulate, and decode information contained in multiscale hierarchical signalling networks. Recent work on pollen tube growth has identified an important role for volume sensing and cell hydrodynamics

as a central mechanism that regulates several key signalling cascades, and has the potential to integrate and synchronize the function of the broader signalling network (Zonia and Munnik, 2007, 2009).

Cells expend substantial resources in sensing, responding to, and adapting to osmotic perturbations and regulating cell volume and cell hydrodynamics. Volume and osmotic changes affect the mechanical/chemical status of the plasma membrane, cellular ionic strength and/or concentrations of specific ions, macromolecular crowding, and proximity of protein-binding partners (Hoffmann *et al.*, 2009). Cell hydrodynamic regulation is linked through feedback control loops to multiple signal transduction cascades including ion fluxes and channels, phospholipids, lipid kinases and lipases, protein kinases and phosphatases, small GTP-binding proteins, cytoskeletal reorganization, reactive oxygen species, osmolyte transport and synthesis, membrane

trafficking, and transcriptional regulation (Hoffmann *et al.*, 2009). New methodologies are enabling real-time visualization of live cell hydrodynamics, and the results show that different regions of the cytoplasm have different water diffusion rates due to differences in macromolecular crowding and structure (Potma *et al.*, 2001a, b).

The overall goal of this review is not an in-depth examination of key signalling and structural elements that are known to regulate pollen tube growth. Rather, this review intends to explore recent work, particularly on cell hydrodynamics, vesicle trafficking, cell wall synthesis, cytoskeletal behaviours, ion dynamics, Rho GTPase, fertilization, and self-incompatibility, and propose new mechanisms that potentially integrate the spatial and temporal activity of key signalling and structural elements into a unified functional network that determines pollen tube growth.

## Cell hydrodynamics, cell morphology, and growth

The cytoplasm has classically been modelled as a viscoelastic or viscoplastic continuum. In this purely hypothetical approximation, the cell interior is considered to be a single homogeneous phase, and changes in osmotic pressure are propagated equally and instantaneously throughout the entire cytoplasm (Fig. 1A). Clearly, this coarse approximation fails to quantify accurately the cytoplasm of a living cell that has two distinct phases—a fluid phase composed of water, ions, soluble proteins, and metabolites, and a solid phase composed of cytoskeletal polymers, endomembrane networks, vesicles, organelles, and particulate matter (Fig. 1B). This section will highlight recent work in various systems that is now refining our understanding of the physical properties of the cytoplasm and cell hydrodynamics.

Examination of blebbing (localized spherical expansion of the cell surface) in mammalian cells and *Dictyostelium* led to the discovery that cell hydrostatic pressure is non-uniform (Charras *et al.*, 2005; Langridge and Kay, 2006). These studies revealed that hydrostatic pressure can be highly asymmetrical, and a localized increase in hydrostatic pressure can induce rupture of the plasma membrane from the underlying cytoskeleton followed by hydrodynamic flow and inflation of the detached membrane. Based on these results, a new poroelastic model has been proposed for the cytoplasm. The poroelastic model considers the cytoplasm to be similar to a fluid-filled sponge, composed of a porous, contractile, elastic solid penetrated by an electrolytic interstitial fluid that moves through the pores in response to electrochemical or pressure gradients (Charras *et al.*, 2005; Spitzer and Poolman, 2005; Mahadevan, 2008; Mitchison *et al.*, 2008). The non-uniform nature of the contractile elastic solid and the electrolytic interstitial fluid results in vectorial pressure and electrochemical gradients, so that the propagation of osmotic pressure is highly dependent on the hydraulic and electrochemical conductivity, the mesh density and channel diameter, and the elastic contraction of the porous network (Mitchison *et al.*, 2008; Spagnoli *et al.*,

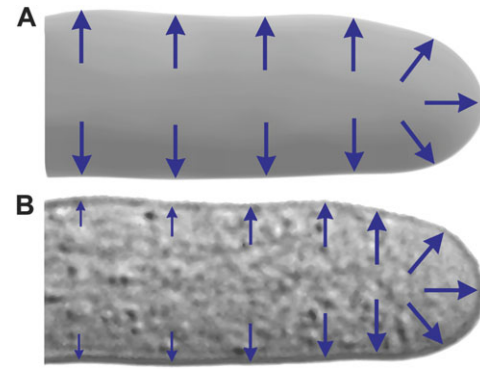

**Fig. 1.** Theory and modelling of pollen tube cytoplasm and osmotic pressure. (A) A semi-cylindrical viscoelastic continuum. The classic model of pollen tube growth simplified biological complexity by approximating the cytoplasm as composed of a single-phase viscoelastic continuum, in which osmotic pressure propagates equally and instantaneously throughout all parts of the cell. In this coarse approximation, osmotic pressure is uniform throughout all parts of the cell and distributed equally and uniformly along the entire plasma membrane (blue arrows). (B) A living pollen tube. The newly emerging hydrodynamic model of pollen tube growth considers a living cell with a crowded cytoplasm consisting of two distinct phases: a solid phase of vesicles, organelles, endomembrane networks, cytoskeletal polymers, and particulate matter; and a fluid phase composed of water, ions, soluble proteins, and metabolites. Theory and experiment agree that the cytoplasm of living cells conforms to a fluid-filled poroelastic network, in which propagation of osmotic pressure is highly dependent on the local hydraulic and electrical conductivity, the local mesh density and channel size, and the elastic contraction of the porous network. In living cells, theory and experiment have conclusively demonstrated that non-equilibrium osmotic pressure exists on physiologically relevant temporal and spatial scales. In the new hydrodynamic model of pollen tube growth, spatial non-equilibrium osmotic pressure is predicted to be highest near the apex and diminish toward the distal tube (blue arrows).

2008). It is important to note that these formulations are based on the incompressibility of both the solid and fluid phases. The time dependency to reach pressure equilibrium is a function of cell size and cytoplasmic diffusion constant, such that it takes longer to reach pressure equilibrium in large cells (such as elongated pollen tubes) and in cytoplasmic regions corresponding to a stiff, dense mesh with narrow pores, infiltrated with very viscous fluid (Mahadevan, 2008; Mitchison *et al.*, 2008). In all cell systems examined to date, asymmetrical pressure gradients are easily achieved—both theoretically and experimentally—on physiologically realistic time and length scales of the order of 10–100 s and 5–10  $\mu\text{m}$ , respectively (Charras *et al.*, 2005; Langridge and Kay, 2006; Mahadevan, 2008; Mitchison *et al.*, 2008; Spagnoli *et al.*, 2008).

Recent compelling evidence in support of the poroelastic fluid-filled sponge model was obtained from an elegant study of the movement of quantum dots (diameter  $\sim 28$  nm) and

natural organelles during inhomogeneous osmotic manipulation of HeLa cells (Charras *et al.*, 2009). The cells were subjected to a localized external hypertonic gradient that forced hydrodynamic flow into the cell on one side and out of the cell on the other side. This forced contraction and displacement of cytoplasm on the dehydrated side of the cell while the unexposed side of the cell was essentially unaffected. This result indicates the presence of a boundary between hyperosmotic and iso-osmotic regions of the cytoplasm, with different hydraulic regions co-existing within a few micrometres and on time scales of tens of seconds. Visual tracking of the degree of movement of quantum dots and natural organelles confirmed a gradient of hydration within the cytoplasm. When the entire cell was subjected to hypertonic shock, the movement of both quantum dots and natural organelles was inhibited as the cytoplasmic pore size collapsed due to whole-cell water efflux and the resultant macromolecular crowding. The observed movements during inhomogeneous osmotic manipulation and osmotic shock were the same in both normal and metabolically poisoned cells, demonstrating that the responses are primarily physical rather than metabolic. A further surprising result of this study was that water flows across the membrane faster than through the cytoplasm. In summary, this study strongly supports a poroelastic model of the cytoplasm and spatio-temporal asymmetry in cell hydrodynamics.

Spatial asymmetries in cell hydrodynamics exist in tobacco pollen tubes (Fig. 1B). Hypotonic challenge induces rapid swelling in the apical 50  $\mu\text{m}$  region while the diameter of the distal tube remains unaffected (Zonia *et al.*, 2002, 2006; Zonia and Munnik, 2004, 2007). This effect is not simply due to cell wall properties, as disruption of either pectin, cellulose synthesis, actin, or microtubules induces swelling confined to the apical region in *Solanum*, conifer, lily, and *Papaver* pollen tubes (Anderhag *et al.*, 2000; Geitmann *et al.*, 2000; Vidali *et al.*, 2001; Lazzaro *et al.*, 2003; Parre and Geitmann, 2005). The entire apical region spanning from the tip to 50  $\mu\text{m}$  distal to the tip can undergo essentially immediate volume increases of up to 59% greater than normal before the increased hydrostatic pressure induces rupture of the cell wall and bursting in tobacco pollen tubes (Zonia *et al.*, 2002). Conversely, hypertonic challenge induces a rapid apical volume decrease of up to 41% less than normal volume (Zonia and Munnik, 2004). Together, these results indicate that water flow across the plasma membrane into or out of the cell is rapid, increased pressure can easily drive expansion of the cell wall, and decreased pressure leads to contraction of the cell wall.

Further work quantified temporal asymmetries in cell hydrodynamics in tobacco pollen tubes undergoing oscillatory growth (Fig. 2) (Zonia *et al.*, 2006). Apical volume oscillates with the same frequency as growth rate oscillations, but the

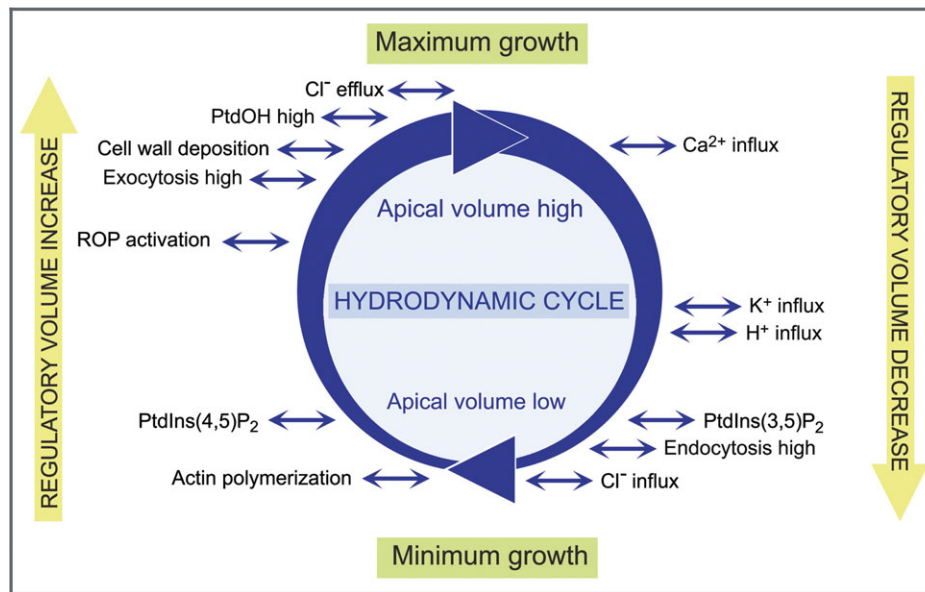

**Fig. 2.** Integration of signalling and structural networks regulating pollen tube growth. Temporal asymmetries in cell osmotic pressure exist due to metabolism and thermodynamic non-equilibrium, which induce continual fluctuations in osmotic potential across the plasma membrane. This induces hydrodynamic flow into or out of the cell, and affects the mechanical/chemical status of the plasma membrane, cellular ionic strength, concentrations of specific ions, macromolecular crowding, and proximity of protein-binding partners. Signalling cascades and structural elements that are involved in stabilizing cell volume and pressure are activated, in a network of coupled reactions that control regulatory volume decrease in response to cell swelling and regulatory volume increase in response to cell shrinking. Experimental data in tobacco pollen tubes show that hydrodynamics behaves as a limit cycle oscillator that entrains growth rate oscillation frequencies. Thus, the hydrodynamic cycle has the potential to function as a travelling wave that integrates the network of coupled oscillators that are involved in pollen tube growth. Each element in the network could be activated in response to a certain osmotic status and input from other elements in the network. The illustration presents a selection of key signalling cascades and structural elements involved in pollen tube growth.

cycles are phase-shifted by  $\sim 180^\circ$ . During each growth cycle, apical volume reaches maximum concurrently with the phase of decreasing growth, and reaches minimum concurrently with the phase of maximally increasing growth. Substitution of  $\text{H}_2\text{O}$  with  $^2\text{H}_2\text{O}$  (deuterium oxide) severely disrupts pollen tube growth and growth rate oscillation frequencies, and induces abnormal pollen tube morphologies (Zonia *et al.*, 2006). These results suggest a mechanism of hydrodynamic loading/unloading during each cycle that is necessary for pollen tube growth. To test this hypothesis, apical volume and growth rate oscillation frequencies were monitored during hypertonic or hypotonic challenge (Zonia *et al.*, 2006). Hypertonic treatment induced growth rate and apical volume oscillation frequencies to halve, corresponding to shifts in growth cycle periods from  $\sim 50$  s to 100 s. Hypotonic treatment induced growth rate and apical volume oscillation frequencies to double, corresponding to shifts in growth cycle periods from  $\sim 50$  s to 25 s and 12 s. The observed period doubling and period halving are characteristic properties of limit cycle oscillators that carry frequency-encoded information, and provide strong evidence that hydrodynamic oscillations are closely

correlated with or in fact form the basis of the pollen tube oscillator that drives growth rate oscillations and oscillations in all other non-linear circuits linked with growth (e.g.  $\text{Ca}^{2+}$  flux and  $\text{Ca}^{2+}$  gradient) (Fig. 2) (Table 1). It is crucial to note that if hydrodynamics was not the oscillator driving growth oscillations (and, for example, cell wall loosening was the true oscillator), then changing hydrodynamic flow would only change the amplitude of each growth cycle, and not the frequency of growth oscillations. Interestingly, recent theoretical analyses suggest that cell hydrodynamics and volume regulation implicitly lead to non-linearity in biochemical and signalling pathways, and forms the basis for emergence of whole-cell oscillatory dynamics (Martin *et al.*, 2009). The result on hypotonic forcing of growth rate oscillation frequencies has recently been re-confirmed in lily pollen tubes (Zerzour *et al.*, 2009). This study also showed that, as expected, manipulation of cell wall properties can lead to changes in growth rate oscillation frequencies. However, there were no data to show dynamically meaningful shifts in growth rate oscillation frequencies as previously shown for hydrodynamic manipulation. Finally, evidence of hydrodynamic efflux at the pollen tube apex was obtained

**Table 1.** Selective overview of regulation of cell signaling by osmotic pressure and cell volume

| Signal/element                             | High osmotic pressure, cell swelling <sup>a,b</sup> | Low osmotic pressure, cell shrinking <sup>a,c</sup> | Experimental system                                                     |
|--------------------------------------------|-----------------------------------------------------|-----------------------------------------------------|-------------------------------------------------------------------------|
| Pollen tube growth                         | Stimulation                                         | Attenuation                                         | Tobacco, lily                                                           |
| Exocytosis                                 | Stimulation                                         | Attenuation                                         | Pollen tubes, guard cells, all vertebrate cells tested                  |
| Endocytosis                                | Attenuation                                         | Stimulation                                         | Pollen tubes, guard cells, all vertebrate cells tested                  |
| Secretion and assembly of cell wall pectin | Stimulation                                         | N.D.                                                | Pollen tubes <sup>d</sup> , <i>Chara</i>                                |
| Actin polymerization (net)                 | Decrease                                            | Increase                                            | Pollen tubes <sup>d</sup> , guard cells, non-adherent vertebrate cells  |
| PtdOH                                      | Increase                                            | Decrease                                            | Pollen tubes, unicellular green algae, all vertebrate cells tested      |
| PtdIns                                     | Decrease                                            | No detectable change <sup>e</sup>                   | Pollen tubes                                                            |
| PtdIns(4,5)P <sub>2</sub>                  | Decrease                                            | Increase                                            | Pollen tubes <sup>f</sup> , all vertebrate cells tested                 |
| PtdIns(3,5)P <sub>2</sub>                  | No detectable change <sup>e</sup>                   | Increase                                            | Pollen tubes, plant cells                                               |
| Ins(1,4,5)P <sub>3</sub>                   | ND                                                  | Increase                                            | <i>Arabidopsis</i> cell culture, seedlings, leaves; carrot cell culture |
| Ins(3,4,5,6)P <sub>4</sub>                 | Decrease <sup>d</sup>                               | Increase <sup>d</sup>                               | Pollen tubes <sup>d</sup> , epithelial cells                            |
| InsP <sub>6</sub>                          | ND                                                  | Increase                                            | Pollen tubes <sup>g</sup> , guard cells, duckweed turions               |
| Cl <sup>-</sup> influx                     | Attenuation                                         | Stimulation                                         | Plant cells, animal cells, bacteria; all cell types tested              |
| Cl <sup>-</sup> efflux                     | Stimulation                                         | Attenuation                                         | Plant cells, animal cells, bacteria; all cell types tested              |
| Ca <sup>2+</sup> influx                    | Stimulation                                         | Attenuation                                         | Plant cells, animal cells, bacteria; all cell types tested              |
| K <sup>+</sup> influx                      | Attenuation                                         | Stimulation                                         | Plant cells, animal cells, bacteria; all cell types tested              |
| K <sup>+</sup> efflux                      | Stimulation                                         | Attenuation                                         | Plant cells, animal cells, bacteria; all cell types tested              |
| H <sup>+</sup> influx                      | Stimulation                                         | Attenuation                                         | Plant cells, animal cells, bacteria; all cell types tested              |
| H <sup>+</sup> efflux                      | Attenuation                                         | Stimulation                                         | Plant cells, animal cells, bacteria; all cell types tested              |
| Rho family GTPases                         | Attenuation                                         | Stimulation                                         | Pollen tubes <sup>?</sup> , epithelial cells                            |
| Pollen grain germination on stigma         | Stimulation <sup>h</sup>                            | Inhibition <sup>h</sup>                             | <i>Brassica</i> , <i>Arabidopsis</i>                                    |
| Sperm cell discharge from pollen tube      | Stimulation                                         | ND                                                  | <i>Torenia</i> , <i>Arabidopsis</i>                                     |

<sup>a</sup> Cell shrinking, swelling can be either global or localized volume changes.

<sup>b</sup> Cell swelling induces in-plane membrane tension, low molecular crowding, low cytosolic ionic strength.

<sup>c</sup> Cell shrinking induces invagination of the plasma membrane, high molecular crowding, high cytosolic ionic strength.

<sup>d</sup> Indirect evidence.

<sup>e</sup> Measurements from whole-cell assays; localized changes in levels or turnover may occur but would be undetectable by the methods used.

<sup>f</sup> In pollen tubes, PtdIns(4,5)P<sub>2</sub> increases with hyperosmosis but no detectable change was measured after hypo-osmosis (see note e)

<sup>g</sup> InsP<sub>6</sub> levels are high in pollen grains and tubes; responses to changes in pressure have yet to be determined

<sup>h</sup> Self-incompatible pollen grains hydrate and germinate; self pollen grains fail to hydrate and fail to germinate

ND, not determined

with Raman microscopy using microinjected  $^2\text{H}_2\text{O}$  as a tracer (Zonia *et al.*, 2006).

Evidence of a role for non-equilibrium hydrodynamics in growth of other plant cells and tissues is emerging. An interesting examination of shoot apical meristem architecture in *Arabidopsis* (Corson *et al.*, 2009) supports the prediction of a role for asymmetrical osmotic pressure during plant cell growth and differentiation (Zonia and Munnik, 2007). The study shows that in fact, correct *in planta* growth patterns could only be theoretically modelled and simulated when turgor pressure was not uniform (Corson *et al.*, 2009).

## Exocytosis and endocytosis in pollen tube growth

Progress in the understanding of molecular events involved in secretory and endosomal trafficking in plants has been discussed in recent reviews (Lam *et al.*, 2007; Foresti and Denecke, 2008; Grefen and Blatt, 2008; Nielsen *et al.*, 2008; Moscatelli and Idili, 2009; Richter *et al.*, 2009). Pollen tubes have extremely active vesicle trafficking, with high rates of exocytosis to support rapid growth rates, and endocytosis to internalize excess membrane and recycle proteins (Samaj *et al.*, 2006; Cheung and Wu, 2008). The long-standing model for pollen tube growth considered that exocytosis occurred at the apex, mediated by the pool of very small vesicles in the apical dome that were thought to be secretory vesicles, and endocytosis occurred distally. However, three recent reports support a shift in our understanding of pollen tube growth.

Report I examined the ultrastructural details of uptake and trafficking of positively and negatively charged nanogold in tobacco pollen tubes (Moscatelli *et al.*, 2007). Positively charged nanogold was first observed in distal regions of pollen tubes,  $\sim 10\ \mu\text{m}$  from the tip, while negatively charged nanogold was first observed near the apex. During longer incubations, negatively charged nanogold labelled vacuole-like compartments, while positively charged nanogold labelled vesicles close to the *trans*-Gogi complex and the rims of *cis* and medial cisternae, and vesicles containing dense cell wall-like material. These results suggest the presence of two functionally distinct endocytosis pathways. Ikarugamycin, an inhibitor of clathrin-dependent endocytosis, interfered with trafficking to both Golgi and vacuole, but did not block all trafficking to the vacuole, suggesting that a clathrin-independent endocytic pathway also exists in pollen tubes.

Report II employed pulse-chase labelling with two different lipophilic styryl dyes (FM 4-64 and FM 1-43) that have different excitation and emission wavelengths. This strategy enabled visualization of the subcellular localization and dynamics of three distinct populations of vesicles in growing tobacco pollen tubes—two endocytic pathways and the site of exocytosis and the growth zone (Zonia and Munnik, 2008a, b, 2009). The results revealed that the entire apical dome is a region of endocytosis, which labels within

1–2 min, and the pool of very small vesicles in the apical dome are endocytic vesicles, which label within 3–5 min (Fig. 2). These vesicles form the characteristic inverse-cone pool of vesicles that undergo retrograde trafficking, with the entire population of endosomal trafficking vesicles in the inverse-cone labelling within 5–10 min. A second pathway of endocytosis was observed in distal regions of pollen tubes, starting at  $\sim 6\ \mu\text{m}$  distal to the tip. These vesicles are much larger than those at the apex and their rate of internalization is substantially slower. Based on the vesicle sizes and kinetics of internalization, the results indicate that smooth vesicle endocytosis occurs at the apex and clathrin-coated vesicle internalization occurs in the distal region. Exocytosis was observed by dynamic tracking of the insertion of discretely labelled vesicles into the plasma membrane in the subapical region, which is the location of the dense actin fringe (Fig. 3) (for further details on actin arrays see the section ‘Cytoskeleton and cell stiffness during swelling and growth’). Exocytosis in the subapical growth zone was also observed using refraction-free high-resolution time-lapse differential interference contrast microscopy, and examination of both individual images and compressed videos (Zonia and Munnik, 2008a, b). Exocytic vesicles were estimated to have diameters of the order of  $\sim 400\ \mu\text{m}$ , in agreement with a previous electron microscopy report that estimated diameters of exocytic vesicles in tobacco pollen tubes at  $\sim 400\text{--}500\ \mu\text{m}$  (Kroh and Knuiman, 1985). This size renders the vesicles well suited to carry bulky cargoes of membrane proteins and cell wall polymers [e.g. the length of the pectin polygalacturonic acid is estimated at  $\sim 100\ \mu\text{m}$  and contains up to 200 GalA residues (Carpita and Gibeaut, 1993)]. The subapical growth zone spans the region from  $3\ \mu\text{m}$  to  $10\ \mu\text{m}$  distal to the tip, and it is highly dynamic and responsive to changes in growth rate. During periods of rapid growth, many vesicles undergo exocytosis in the mid-zone or trailing edge of the growth zone ( $\sim 5\text{--}10\ \mu\text{m}$  distal to the apex). During periods of slow growth or following transient growth arrest, many vesicles undergo exocytosis near the leading edge of the growth zone ( $\sim 3\text{--}5\ \mu\text{m}$  distal to the apex) (Zonia and Munnik, 2008a, 2009). In normally growing pollen tubes, there was no evidence of exocytosis at the apex. Hyperosmotic treatment (see below) revealed information about plasma membrane flow from the site of exocytosis in the subapex—membrane flow is primarily anterograde with uptake/recycling along the apex, and a small degree of retrograde flow. Anterograde membrane flow combined with endocytic recycling along the apex results in the appearance of secreted proteins in the pool of small vesicles in the apical dome (Zonia and Munnik, 2009). Together, these results support a new model of pollen tube growth, with exocytosis in the subapex, smooth vesicle endocytosis along the apical dome, the pool of very small vesicles in the apical dome are endosomal, and clathrin-mediated endocytosis occurring distally.

Report III used FM 1-43 to label vesicles in growing lily pollen tubes, to visualize the speed and direction of movement of labelled vesicles with time-lapse high-speed confocal microscopy and spatiotemporal image correlation

analysis (Bove *et al.*, 2008). Pollen tubes were labelled for 5 min before extensive washout of the fluorophore and transfer of washed pollen tubes to agarose medium for mounting on slides. The vector maps showed overall vesicle motion patterns, with prominent retrograde trafficking of vesicles away from the apex in the inverted cone. Another prominent pool of vesicles showed anterograde trafficking along the cortex to the subapical region, where they appeared to change direction, moving toward the centre and reversing. Vesicles undergoing anterograde trafficking (presumably exocytic vesicles) were observed to accumulate in the subapical region corresponding to the location of the actin fringe. This corresponds to the active growth zone identified in Report II for tobacco pollen tubes. To identify short-range or erratic motion of vesicles in the apical dome, Report III reduced the window size and time scale of the analysis. This showed a diminishingly small degree of anterograde vesicle motion from the subapex into the apical dome. It is important to note that the methods used did not allow visualization of actual exocytosis or endocytosis events. Nevertheless, in their model the authors agree that the apex is the site of smooth vesicle endocytosis and that clathrin-mediated endocytosis occurs distally. They suggest that exocytosis occurs in the shoulder of the apical dome (this corresponds to the leading edge of the growth zone identified in Report II), or a form of fast exocytosis without complete incorporation of the vesicle membrane (termed kiss-and-run) occurs at the apical plasma membrane.

Cell swelling and shrinking has profound effects on plasma membrane architecture and in-plane tension, and is known to stimulate vesicle incorporation (cell swelling) or retrieval (cell shrinking) in many cell types. Hypotonic treatment induces increased growth rates in populations of pollen tubes and increases growth rate oscillation frequencies (Zonia *et al.*, 2002, 2006; Zerzour *et al.*, 2009), while hypertonic treatment decreases growth rates in populations of pollen tubes and decreases growth rate oscillation frequencies (Zonia *et al.*, 2002, 2006) (Table 1). This indicates that growth is tightly linked with hydrodynamics, and if so, then osmotic perturbation should affect vesicle trafficking dynamics. This hypothesis was tested in Report II by examination of vesicle trafficking dynamics in pollen tubes subjected to osmotic manipulation (Zonia and Munnik, 2008a). The results showed that hypotonic treatment attenuated smooth vesicle endocytosis at the apex and stimulated exocytosis, supporting the increased growth rate by a higher rate of secretion and reduced uptake/recycling (Table 1). During oscillatory growth, the start of the growth cycle occurs when the apical volume is highest (Zonia *et al.*, 2006). Thus, the combined data indicate a temporal correlation linking exocytosis and the start of the growth cycle (Fig. 2). Conversely, hypertonic treatment greatly stimulated smooth vesicle endocytosis at the apex and inhibited exocytosis, supporting contraction of the protoplast during water efflux (Table 1). During oscillatory growth, the apical volume is lowest during the phase of minimum growth, consistent with the data showing stimulation of endocytosis and attenuation of exocytosis under these conditions (Fig.

2). Clathrin-mediated endocytosis in distal regions was only slightly dampened by hypotonic treatment, but was stimulated by hypertonic treatment. In summary, these results are consistent with a central role for hydrodynamics in the regulation of vesicle trafficking, modulation of the rates of exocytosis and endocytosis, and integration of exocytosis and endocytosis rates with the growth rate (Zonia and Munnik, 2008a, 2009).

Despite these recent reports, the subcellular localization of exocytosis remains controversial. A recent study used fluorescence recovery after photobleaching and a secreted green fluorescent protein–receptor-like kinase (GFP–RLK) in tobacco pollen tubes, and reports evidence in support of exocytosis at the apex (Lee *et al.*, 2008c). During the first 30 s after photobleaching, the pollen tube grew slightly; there was moderate recovery of fluorescence along the apical dome and minimal recovery of fluorescence in the shoulder of the apical dome. During 30–60 s after photobleaching, the pollen tube stopped growing, there was a large increase in fluorescence along the apical dome, and a corresponding increase in fluorescence in the shoulder of the apical dome (although the levels measured in the shoulder remained lower than along the apical dome). By 90 s after photobleaching, the pollen tube again grew slightly and fluorescence in the shoulder of the apical dome was comparable with fluorescence along the apical dome. These results were interpreted as evidence of exocytosis at the apex, thus supporting the long-standing model of pollen tube growth.

## Cell wall deposition and assembly in pollen tube growth

Despite recent progress in our understanding of the regulation and biosynthesis of plant cell walls (Geisler *et al.*, 2008; Szymanski and Cosgrove, 2009), there are still knowledge gaps, particularly regarding the biochemistry of *in muro* wall synthesis. The long-standing model of pollen tube growth considers that growth is ultimately dependent on biochemical modification (called cell wall loosening) of the wall at the apex, where exocytosis is believed to occur (Holdaway-Clarke and Hepler, 2003). Cell wall yielding then allows turgor-induced stretching and stimulates the flow of water into the cell, down its potential gradient. During oscillatory growth, enzymes that mediate wall yielding are believed to be periodically activated and inhibited, and this is thought to drive periodicity in wall loosening and growth.

The polymers required for synthesis and growth of the pollen tube cell wall are delivered by secretion in the subapical growth zone. The cell wall in the apical dome and subapical growth zone is essentially exclusively composed of primarily methylesterified pectins; unesterified pectins and the main load-bearing component of primary cell walls, the cellulose–hemicellulose framework, are located in distal regions (Taylor and Hepler, 1997; Bosch and Hepler, 2005; Parre and Geitmann, 2005). The pectin mesh is thought to be largely independent of and without extensive covalent cross-links to the cellulose–hemicellulose

framework, irrespective of the degree of pectin methylesterification (Carpita and Gibeaut, 1993; Cosgrove, 2005). Pectins are secreted as jelly-like polymers in the subapical growth zone in a highly methylesterified form, with ~70–80% of GalA residues methylesterified and 20–30% of residues unesterified. Newly secreted pectins are recognized by the JIM7 antibody that binds to at least one methylesterified GalA adjacent to one unesterified GalA (Bosch and Hepler, 2005). Highly unesterified pectins are identified by recognition with the JIM5 antibody that binds to at least four contiguous unesterified GalA residues (Bosch and Hepler, 2005). Pectins in the distal pollen tube are highly unesterified. The higher the degree of de-esterification, the more rigid the pectin gel becomes due to extensive cross-linking with cations such as  $\text{Ca}^{2+}$ .

Pectin de-esterification is catalysed by pectin methylesterase (PME) (Carpita and Gibeaut, 1993; Bosch and Hepler, 2005, 2006; Bosch *et al.*, 2005; Pelloux *et al.*, 2007; Rockel *et al.*, 2008). In *Arabidopsis* pollen tubes, PME was localized at the cell wall along the entire pollen tube including the apical dome, while an inhibitor of PME (PMEI) was localized primarily along the apical dome and in the subapex (Rockel *et al.*, 2008). This differential spatial localization pattern can explain why PME activity is excluded from the apex and highly unesterified pectins are localized to distal regions of pollen tubes. Subcellular localization patterns of membrane proteins are determined by the site of exocytosis (Zonia and Munnik, 2009). PMEI localization along the apical dome probably results from exocytic insertion in the mid-zone and near the leading edge of the growth zone followed by anterograde movement to the apex (Zonia and Munnik, 2009). PMEI was found in FYVE-induced endosomal aggregates (Rockel *et al.*, 2008), consistent with endocytic uptake at the apex.

Detailed biochemical knowledge of the pectin mesh structure at the pollen tube apex is lacking. It is known that turgor pressure provides the energy to drive incorporation of secreted pectins into the cell wall of *Chara* (Proseus and Boyer, 2005, 2006), and this is considered to be generally true for plant cells (Cosgrove, 2005) (Table 1). Turgor pressure in the apical region of tobacco pollen tubes is highest just before the start of the growth cycle, thus supporting a temporal correlation between hydrodynamics and cell wall deposition (Fig. 2). Newly secreted pectins diffuse some distance in the wall during turgor-induced wall stretching, indicating that their position is not immediately fixed and the existing cell wall tolerates significant stretching, pliancy, and porosity (Cosgrove, 2005, and references therein). Integration of these immature cell wall materials into the existing wall is initially mediated by physical interactions (Carpita and Gibeaut, 1993; Cosgrove, 2005). The pectin chains condense by cross-linking with  $\text{Ca}^{2+}$  to form junction zones linking two antiparallel chains. The number of contiguous unesterified GalA residues required to form a stable junction *in muro* is unknown. At very low  $\text{Ca}^{2+}$  concentrations, it is thought that two chains can form a stable junction when the overlap is ~14 GalA residues; if sufficient  $\text{Ca}^{2+}$  is present, some interrupting esterified GalA can be tolerated and still form

a stable junction zone; if the  $\text{Ca}^{2+}$  concentration is high, formation of stable junctions is prevalent and four-chain or higher order stacking of chains into multiple eggbox structures occurs (Carpita and Gibeaut, 1993, and references therein). These studies suggest that the cell wall in the expanding subapical growth zone is composed of a dynamically changing population of newly secreted pectins and condensed pectin chains. The cell wall distal to the growth zone would rapidly become a rigid gel due to the activity of PME, while the cell wall anterior to the growth zone would retain more pliancy even as the population of pectin chains and stacked chains continued to accumulate.

Biochemical modification (cell wall loosening) of the wall in the distal pollen tube is likely to be required during synthesis and assembly of the cellulose–hemicellulose framework embedded in the rigid unesterified pectin matrix. However, it is probable that modification of the existing pectin mesh in the actively expanding subapical growth zone is not required for the secretion and deposition of new pectins (Cosgrove, 2005; Proseus and Boyer, 2005, 2006), or for the condensation and assembly of new pectin chains (Carpita and Gibeaut, 1993; Cosgrove, 2005). Thus, cell wall synthesis in the expanding growth zone would be self-organized by physical processes dependent on apical osmotic pressure, which drives incorporation of newly secreted pectins into the wall (Proseus and Boyer, 2005, 2006) and stretches the existing wall to enable diffusion, self-assembly, and integration of the newly secreted wall materials into the apical pectin mesh (Carpita and Gibeaut, 1993; Cosgrove, 2005) (Fig. 2). Apical volume and pressure oscillate during oscillatory pollen tube growth, and this leads to periodicity in disruption of the cell surface in the actively expanding growth zone (Zonia and Munnik, 2008b), probably due to periodicity in the secretion, diffusion, deposition, and assembly of newly delivered pectins. Support for this was recently obtained by observations of periodicity in accumulation of pectin wall material along the apical dome during oscillatory growth of tobacco and lily pollen tubes (McKenna *et al.*, 2009). Additionally, experimentally induced relaxation of the cell wall using PME or auxin leads to changes in growth rate oscillation frequencies (Zerzour *et al.*, 2009).

## Cytoskeleton and cell stiffness during swelling and growth

Cytoskeletal arrays have central roles in a number of processes that are crucial for plant cell growth and function, including cytoplasmic streaming and intracellular transport, exocytosis and endocytosis, and cell division and morphogenesis (Staiger, 2000; Wasteneys and Galway, 2003; Smith and Oppenheimer, 2005; Staiger and Blanchoin, 2006; Hussey *et al.*, 2006; Lovy-Wheeler *et al.*, 2007; Cai and Cresti, 2009). The architectures of cytoskeletal polymers have been studied extensively in pollen tubes, and continual advances in methods to label actin and microtubule arrays in live cells are refining our understanding of their regulation and

dynamics (Cheung *et al.*, 2008; Era *et al.*, 2009; Vidali *et al.*, 2009). Actin polymers are organized as long filaments or bundled filaments with an axial organization along the pollen tube from the base to the subapex, where they become organized into a short and dense fringe structure (Lovy-Wheeler *et al.*, 2005; Vidali *et al.*, 2009; Cheung *et al.*, 2008). Very fine actin filaments periodically extend between the subapical fringe and the apex (Fu *et al.*, 2001). In pollen tubes undergoing oscillatory growth, the appearance of very fine filaments near the apex correlates with the phase of minimum growth rate and reaches a maximum before the growth peak (Fu *et al.*, 2001; Lee *et al.*, 2008c). Exocytic vesicles are trafficked along actin filaments by myosin motors and delivered to the site of exocytosis in the subapical growth zone via the actin fringe. Microtubule arrays and their associated kinesin motors are known to be important for trafficking of organelles (Romagnoli *et al.*, 2003, 2007; Cai and Cresti, 2009), and for the organization and synthesis of the cellulose–hemicellulose network of the plant cell wall (Lloyd and Chan, 2008; Crowell *et al.*, 2009).

The properties of the solid phase of the cytoplasm are determined and regulated to a large extent by actin architecture and dynamics. Actin polymers display features of an active gel with non-linear mechanical properties of both particles and stiff rods, and in live cells they are far from equilibrium (Bausch and Kroy, 2006). Extensive reorganization of the actin cytoskeleton occurs rapidly in response to osmotic perturbations in most vertebrate cell types (Spagnoli *et al.*, 2008; Hoffmann *et al.*, 2009, and references therein). Cell swelling induces a net decrease in actin polymerization, while cell shrinking induces a net increase (Table 1). These properties are consistent with observations of actin arrays in the apical dome during oscillatory pollen tube growth. Closer examination of a range of cell types under differing conditions revealed that during cell swelling or when subjected to a transient shear force, the actin cytoskeleton fluidizes in a manner that marks it as a universal response (Treatat *et al.*, 2007; Spagnoli *et al.*, 2008). A single unifying relationship emerged in which the closer the system was to a solid-like state before application of a transient force, the greater the extent of fluidization and the faster subsequent resolidification. This behaviour is consistent with soft glass rheology. Many cell types are known to have cytoplasmic glasses and display glassy phase transitions, including *Typha latifolia* pollen (Buitink *et al.*, 1998, 2000). The end result is counterintuitive but consistent with glass rheology, in that cells become softer when subjected to transient force, as a result of fluidization of the cytoplasmic glass (Treatat *et al.*, 2007). Similarly, when subjected to osmotic swelling, cells become softer and not stiffer as measured by atomic force microscopy (Spagnoli *et al.*, 2008). A recent extension of this work conclusively demonstrated that hyperosmotic treatment inducing hydrodynamic efflux and cell shrinking causes cells to become stiffer (Zhou *et al.*, 2009). Thus, the combined evidence on cell properties following hydrodynamic treatment distils to a universal response where cells become softer as they swell and stiffer

as they shrink (Treatat *et al.*, 2007; Spagnoli *et al.*, 2008; Zhou *et al.*, 2009).

These results have interesting ramifications for pollen tubes during oscillatory growth. A comparison of apical volume oscillations with oscillations in actin filament organization at the apex reveals that actin filaments extend near to the apex when the apical volume is minimal (temporal correspondence to the phase of minimum growth), while actin filaments are absent from the apex when the apical volume is maximal (temporal correspondence to the phase of maximum growth) (Fig. 3). Thus, due to cell geometry, vectorial hydrodynamic flow, and properties of the cytoskeleton, turgor-induced elongation of the tip may be mediated by a spatially localized pressure increase only at the apex that causes localized expansion of the plasma membrane proximal to the fine actin filaments near the apex, in a process similar to cell blebbing (Fig. 3). This further suggests that dynamic reorganization of the actin architecture at the pollen tube apex may be mediated at least in part by physical forces in addition to the known actin-binding proteins and regulators that modulate actin polymerization and depolymerization. Fluidization of the cytoplasm during the phase of maximally increasing osmotic pressure would also serve as a safety valve that ensures sufficient increase in pressure to drive growth but buffers the apical plasma membrane and pectin wall from a catastrophic pressure increase by redistribution of excess pressure into the cytoskeletal network.

A recent study used a micro-indenter to probe mechanically the relative stiffness/compliance of growing pollen tubes and reports some evidence to suggest that the subapical growth zone becomes more compliant before the start of the growth cycle (Zerzour *et al.*, 2009), which corresponds to a phase with increased osmotic swelling and is thus consistent with the universal response. However, the data also show evidence of a transient increase in stiffness just at the start of the growth cycle, which corresponds to a phase with decreased volume and apical shrinking, and is also consistent with the universal response. Crucial controls to measure relative stiffness and compliance in osmotically swollen and shrunken pollen tubes were lacking. Thus, it is not yet clear whether the measured changes in stiffness or compliance in the pollen tube subapex reflect the appearance and assembly of newly secreted immature wall materials in the subapical growth zone, fluidization of the cytoskeleton during apical volume increase or transient force, or stiffening of the apical region during hydrodynamic efflux and apical shrinking.

### Phosphoinositide, phosphatidic acid, and inositol polyphosphate signalling

Phospholipids and their metabolites are a major class of cellular signals that are involved in ion channel regulation, cytoskeletal organization, membrane trafficking, and membrane architecture. The biochemistry and functional roles of phospholipid signalling in plants have been addressed in



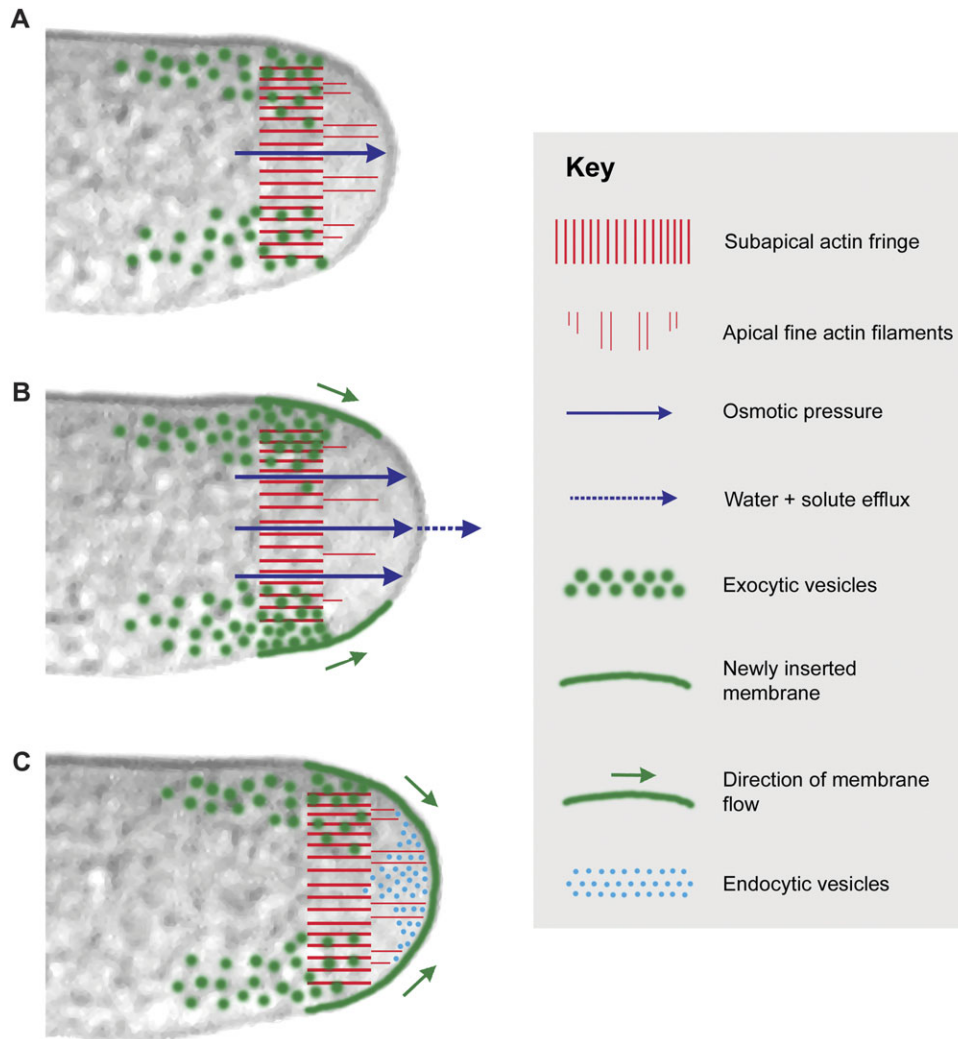

**Fig. 3.** The hydrodynamic model of pollen tube growth. For simplicity, only eight elements of the entire growth network are depicted as defined in the key. Temporal and spatial asymmetries in osmotic pressure are proposed to drive pollen tube growth in a process with similarities to blebbing. (A) Intermediate osmotic pressure. Mass flow and hydraulic conductivity establish vectorial hydrodynamic flux toward the apex. Increasing osmotic pressure in the apical region will differentially exert localized pressure effects depending on plasma membrane attachment to the local cytoplasmic architecture. The apical dome presents an osmotic sink due to exclusion of larger vesicles, organelles, endomembrane networks, and extensively bundled actin cables, and due to hydraulic and elastic contraction of the rest of the cytoplasm. (B) High osmotic pressure. Increasing pressure on the apical plasma membrane will exploit any weak point, force it to bulge outward, and detach the local area from any underlying cytoplasmic architectures. The entire local area then becomes a weak point for further membrane detachment, enabling increased hydrodynamic flow and stretching of the membrane. The increased stretch and flow elongate the newly inserted membrane in the growth zone toward the apex. (C) Low osmotic pressure after hydrodynamic unloading at the apex and apical volume decrease. Newly inserted membrane flows toward the apex where it is internalized for recycling by smooth vesicle endocytosis. The actin networks comprising the subapical fringe undergo an anterograde shift; nothing is known about how this occurs but it probably involves net polymerization. There is a net increase (net polymerization) in apical fine actin filaments and these extend between the subapical fringe and the apical plasma membrane. Endocytic and endosomal trafficking undergo increases during this phase. For simplicity, endocytosis at the apex is depicted only at this phase (C), but experimental evidence shows that it is essentially constitutive.

detail in recent reviews (Meijer and Munnik, 2003; Testerink and Munnik, 2005; Zonia and Munnik, 2006; Thole and Nielsen, 2008; Heilmann, 2009; Munnik and Testerink, 2009; Xue *et al.*, 2009; Munnik and Vermeer, 2010). Recent work with fluorescent biosensors has revealed detailed information about the subcellular localization of specific components involved in plant phospholipid signalling. Cor-

relation of these results with previous biochemical analyses enables a broader understanding of signalling cascades in pollen tube growth and function, and has identified four major hubs (including metabolic precursors and products) that revolve around phosphatidylinositol 4,5-bisphosphate [PtdIns(4,5)P<sub>2</sub>], phosphatidic acid (PtdOH), phosphatidylinositol 3-phosphate (PtdIns3P), and the soluble inositol

polyphosphates. This section will focus on spatiotemporal dynamics of these lipid signals in light of new data on vesicle trafficking and cell hydrodynamics in pollen tube growth.

PtdIns(4,5)P<sub>2</sub> is involved in clathrin-mediated endocytosis (Brearley, 2008; König *et al.*, 2008; Botelho, 2009) and reorganization of the actin cytoskeleton (Staiger, 2000; Meijer and Munnik, 2003; Staiger and Blanchoin, 2006). PtdIns(4,5)P<sub>2</sub> is synthesized via phosphorylation of PtdIns4P by phosphatidylinositol-4-phosphate 5-kinase (PI4P5K), and its hydrolysis by phospholipase C (PLC) produces diacylglycerol (DAG) and inositol 1,4,5-trisphosphate [Ins(1,4,5)P<sub>3</sub>]. PtdIns(4,5)P<sub>2</sub> has a rapid turnover rate in growing tobacco pollen tubes (Zonia and Munnik, 2004). A biosensor specific for PtdIns(4,5)P<sub>2</sub> (YFP:PH<sub>PLCδ1</sub>) localizes to the plasma membrane in the apex, apical dome, and subapex (Kost *et al.*, 1999; Helling *et al.*, 2006). In root hairs, a probe for PtdIns4P (YFP:PH<sub>FAPP1</sub>) is localized on motile punctate structures that label with a Golgi probe, and also has a gradient of localization along the plasma membrane that is highest in the apical dome and subapex (Vermeer *et al.*, 2009). Fluorescent constructs with PIP5K4 (PIP5K4:GFP) and PIP5K5 (PIP5K5:YFP) show strong localization in the subapex of tobacco and *Arabidopsis* pollen tubes, with diminished localization along the flanks of the apical dome (Sousa *et al.*, 2008; Ischebeck *et al.*, 2008). PLC3 (PLC3:YFP) from tobacco and PLC1 (GFP:PLC1) from petunia show prominent accumulation along the subapex and distal plasma membrane in tobacco and petunia pollen tubes, respectively (Dowd *et al.*, 2006; Helling *et al.*, 2006). DAG (Cys1:YFP) accumulates at the plasma membrane in tobacco pollen tubes similarly to PtdIns(4,5)P<sub>2</sub>, along the apical dome and subapex, but also accumulates in the distal tube (Helling *et al.*, 2006).

The results from mutant analyses, inhibitor effects, and localization studies of PtdIns(4,5)P<sub>2</sub> are easily interpreted within the framework of the new model for pollen tube growth. Biosynthesis of PtdIns(4,5)P<sub>2</sub> appears to occur at the plasma membrane via PIP5K phosphorylation of PtdIns4P, which is thought to mediate trafficking of exocytic vesicles from the *trans*-Golgi complex to the plasma membrane (Thole and Nielsen, 2008; Heilmann, 2009). Exocytic vesicles incorporate into the plasma membrane in the subapex, thus formation of PtdIns(4,5)P<sub>2</sub> would occur in this region. Anterograde membrane flow from the subapex to the apex would lead to the observed distribution of PtdIns(4,5)P<sub>2</sub> in the subapex and along the apical dome. A low level of PtdIns(4,5)P<sub>2</sub> retrograde flow from the subapex is a substrate pool for PLC hydrolysis, as PLC localizes along the distal membrane and to a reduced degree in the subapex, and thus extensive spreading of PtdIns(4,5)P<sub>2</sub> in distal regions is prevented. DAG is small and mobile, and readily diffuses through the membrane, thus its localization both anterograde and retrograde to the subapex (Helling *et al.*, 2006). Blocking PLC activity caused spreading of PtdIns(4,5)P<sub>2</sub> from the apical region to the distal tube, and inhibited the accumulation of DAG (Helling *et al.*, 2006), results that are consistent with the new growth model. Fluorescence recovery

after photobleaching (FRAP) of the lateral plasma membrane distally adjacent to the subapex showed that PLC1 undergoes retrograde flow from the subapex (Dowd *et al.*, 2006), further supporting the new model. The same study performed FRAP of the area near the apical dome that includes the growth zone and the pool of endosomal vesicles, and observed recovery within 5–10 s; however, this could reflect recovery of exocytic and/or endocytic pathways (Dowd *et al.*, 2006). The *pip5k4* null mutants have reduced endocytic uptake and membrane recycling in tobacco pollen tubes (Sousa *et al.*, 2008), supporting a role for apical PtdIns(4,5)P<sub>2</sub> in endocytosis. Overexpression of either PIP5K4 or PIP5K5 in *Arabidopsis* pollen tubes caused an increase and mislocalization of PtdIns(4,5)P<sub>2</sub> (Red-Star:PH<sub>PLCδ1</sub>), and induced tip branching and increased accumulation of pectin (Ischebeck *et al.*, 2008). This highlights the importance of localization of PtdIns(4,5)P<sub>2</sub> for correct signalling during pollen tube growth.

The second major hub of signalling revolves around PtdOH. PtdOH can be synthesized by the PLC and/or PLD signalling pathways: via PLC by phosphorylation of DAG by diacylglycerol kinase (DGK), or via PLD by hydrolysis of structural lipids such as phosphatidylcholine or phosphatidylethanolamine (Meijer and Munnik, 2003; Wang, 2004; Testerink and Munnik, 2005; Zonia and Munnik, 2006; Arisz *et al.*, 2009; Li *et al.*, 2009; Munnik and Testerink, 2009). PtdOH signalling is important for pollen tube growth and is proposed to have roles in membrane architecture and trafficking (Zonia and Munnik, 2004, 2009; Monteiro *et al.*, 2005a, b). PtdOH formation has a profound effect on membrane curvature, surface charge, and protein interaction (Kooijman *et al.*, 2003, 2005, 2007, 2009; Kooijman and Burger, 2009). In animal cells, PtdOH is proposed to have a biophysical role in generating negative membrane curvature to promote both exocytosis and endocytosis (Bader and Vitale, 2009; Donaldson, 2009), and PtdOH and PLD are linked with the regulation of PI4P5K and organization of the actin cytoskeleton (Cockcroft, 2009; Rudge and Wakelam, 2009). In plant cells, PtdOH has recently been shown to bind actin-capping protein, which stimulates the uncapping of actin filament barbed ends and promotes actin filament assembly (Huang *et al.*, 2006; Staiger and Blanchoin, 2006). PtdOH is phosphorylated by phosphatidic acid kinase (PAK) to produce diacylglycerol pyrophosphate (DGPP). Localization studies show that DAG accumulates along the entire apical dome, the subapex, and distal regions (Helling *et al.*, 2006), indicating that it undergoes lateral diffusion through the plasma membrane from the site of its biosynthesis in the subapex (Zonia and Munnik, 2008a, 2009). This represents an abundant substrate pool for spatiotemporal activation of DGK. In growing tobacco pollen tubes, PtdOH has a very rapid turnover rate and high level of accumulation, and DGPP turnover and accumulation are similar to those of PtdOH but at a reduced level (Zonia and Munnik, 2004). The evidence in tobacco and *Agapanthus* pollen tubes indicates that PtdOH results from activation of both PLD and PLC pathways (Zonia and Munnik, 2004; Monteiro

*et al.*, 2005a). This could function as a tight cross-link to integrate signalling from both pathways.

Less research has been invested to date in the third signalling hub that revolves around PtdIns3P. PtdIns3P is produced via phosphorylation of PtdIns by PI3K. PI3P5K subsequently phosphorylates PtdIns3P to produce PtdIns(3,5)P<sub>2</sub>. *Arabidopsis* contains a single PI3K (AtVPS34) and knockout mutations are lethal, indicating the importance of this signalling pathway (Welters *et al.*, 1994; Lee *et al.*, 2008b). Two putative PI3P5K homologues have been identified in *Arabidopsis*, FAB1A and FAB1B (Mueller-Rober and Pical, 2002; Whitley *et al.*, 2009). Double mutant *fab1afab1b* lines are pollen lethal, while single mutants have severe defects in vacuolar organization in pollen microspores (Whitley *et al.*, 2009). In yeast, PtdIns3P and PtdIns(3,5)P<sub>2</sub> are involved in membrane trafficking through the late endosomal pathway to the vacuole (Michell *et al.*, 2006; Dove *et al.*, 2009). Fluorescent biosensor constructs with a domain that specifically binds PtdIns3P, called FYVE, have been used to probe plant cells. In BY-2 cells, YFP:2XFYVE localizes on late endosomes and the pre-vacuolar compartment; in guard cells and leaf epidermal cells of *Arabidopsis* it localizes on late endosomes and the vacuolar membrane (Vermeer *et al.*, 2006). In *Arabidopsis* root hairs, GFP:2XFYVE localizes on large particles that appear to be late endosomes (Lee *et al.*, 2008a). In tobacco pollen tubes, mRFP:FYVE labelled large aggregates, consistent with endosomal/vacuolar trafficking (Rockel *et al.*, 2008).

Inositol polyphosphate signals have demonstrated roles in ion channel regulation, ion fluxes, membrane trafficking, and mRNA export from the nucleus (Irvine and Schell, 2001; Munnik and Vermeer, 2010). There are up to 60 different inositol polyphosphate isomers, but the function of only a few of them is presently known. The classic signal in mammalian cells, Ins(1,4,5)P<sub>3</sub>, is involved in mobilizing free Ca<sup>2+</sup> from intracellular stores following receptor-mediated hydrolysis of PtdIns(4,5)P<sub>2</sub> to Ins(1,4,5)P<sub>3</sub> and DAG (Irvine, 2003). However, in yeast cells, the evidence indicates that Ins(1,4,5)P<sub>3</sub> is further phosphorylated by inositol phosphate kinases (IPK1 and IPK2) to InsP<sub>4</sub>, InsP<sub>5</sub>, and InsP<sub>6</sub> (inositol hexakisphosphate, also called phytic acid), and it is the InsP<sub>6</sub> product of InsP<sub>3</sub> metabolism that functions as the signal involved in mobilizing mRNA export from the nucleus (York *et al.*, 1999; Ives *et al.*, 2000; Perera *et al.*, 2004; York, 2006). IPK2 has a demonstrated role in pollen tube growth, with antisense lines undergoing increased growth under non-optimal low Ca<sup>2+</sup> concentrations (Xu *et al.*, 2005). In guard cells, InsP<sub>6</sub> mobilizes cytosolic free Ca<sup>2+</sup> from endomembrane stores (Lemtiri-Chlieh *et al.*, 2003) and specifically inhibits an inward rectifying K<sup>+</sup> channel (*I*<sub>K,in</sub>) in a Ca<sup>2+</sup>-dependent manner (Lemtiri-Chlieh *et al.*, 2000). These studies showed that InsP<sub>6</sub> was ~100-fold more potent than Ins(1,4,5)P<sub>3</sub> in inhibiting *I*<sub>K,in</sub>. In pollen tubes, previous studies have documented a time-lagged increase in free Ca<sup>2+</sup> after release of caged Ins(1,4,5)P<sub>3</sub> (Franklin-Tong *et al.*, 1996; Malho, 1998). Maximal free Ca<sup>2+</sup> increases were detected during ~3.5–10 min after Ins(1,4,5)P<sub>3</sub> release (Franklin-Tong *et al.*, 1996). This suggests that microinjected

Ins(1,4,5)P<sub>3</sub> might be further phosphorylated, and that higher order inositol polyphosphates such as InsP<sub>6</sub> might function to mediate Ca<sup>2+</sup> mobilization as shown in guard cells.

A second inositol polyphosphate with a specific role in tobacco pollen tube growth is Ins(3,4,5,6)P<sub>4</sub> (Zonia *et al.*, 2002). Current evidence indicates that Ins(3,4,5,6)P<sub>4</sub> synthesis is linked to Ins(1,3,4,5,6)P<sub>5</sub> by a reversible phosphatase/kinase cascade (Shears, 1998; Brearley and Hanke, 2000; Irvine and Schell, 2001). The function of Ins(3,4,5,6)P<sub>4</sub> was first identified in epithelial cells, where it specifically inhibits a Cl<sup>-</sup> channel that is involved in maintenance of cell volume and secretion (Shears, 1998; Ho *et al.*, 2001; Rudolf *et al.*, 2003; Mitchell *et al.*, 2008). Cl<sup>-</sup> channels have crucial roles in plant cell osmoregulation (Teodoro *et al.*, 1998; Shabala *et al.*, 2000; White and Broadley, 2001). In tobacco pollen tubes, microinjected Ins(3,4,5,6)P<sub>4</sub> specifically inhibits Cl<sup>-</sup> efflux from the apex, induces massive swelling of the apical region, and ultimately inhibits pollen tube growth (Zonia *et al.*, 2002). It is proposed that Ins(3,4,5,6)P<sub>4</sub> has a role in regulating cell hydrodynamics, osmotic pressure, and apical volume during pollen tube growth by its inhibition of anion efflux from the apex (Zonia and Munnik, 2006, 2007).

PtdIns(4,5)P<sub>2</sub> levels rapidly increase in response to hyperosmotic cell volume decrease in a variety of cell types (Hoffman *et al.*, 2009) (Table 1). PtdIns(4,5)P<sub>2</sub> levels also increased rapidly following hyperosmosis in tobacco pollen tubes (Zonia and Munnik, 2004) (Table 1) (Fig. 2). The increased PtdIns(4,5)P<sub>2</sub> will have profound effects on membrane trafficking and actin cytoskeletal organization. As discussed in previous sections, hyperosmosis increases endocytosis and is predicted to promote a net increase in actin polymerization, temporally consistent with the phase of minimum growth. Levels of PtdIns(3,5)P<sub>2</sub> also increase in response to hyperosmosis (Zonia and Munnik, 2004) (Table 1) (Fig. 2). D-3-Polyphosphoinositides are involved in endosomal trafficking, and thus could have a crucial role in managing the increased flux through endocytic/endosomal pathways in response to hyperosmotically induced cell shrinking.

Hypo-osmotic cell swelling activates PLD in mammalian cells (Tomassen *et al.*, 2004; Hoffmann *et al.*, 2009) and induces increased PtdOH in the unicellular green alga *Dunaliella salina* (Einspahr *et al.*, 1988) (Table 1). In pollen tubes, hypo-osmotic cell swelling activates PLD and increases PtdOH levels within 30 s (Zonia and Munnik, 2004) (Fig. 2). Activation of the PLD pathway potentiates Cl<sup>-</sup> secretion in mammalian cells (Vajanaphanich *et al.*, 1993; Oprins *et al.*, 2001, 2002), which drives water efflux and regulatory cell volume decrease. Increased PtdOH promotes negative curvature of the plasma membrane, which facilitates exocytic vesicle fusion and secretion (Kooijman *et al.*, 2003, 2005; Bader and Vitale, 2009; Kooijman and Burger, 2009). This supports the temporal correlation of PtdOH increase, Cl<sup>-</sup> secretion, exocytosis, and growth (Fig. 2). Additionally, increased PtdOH could promote actin assembly at the barbed ends by binding to actin-capping protein (Huang *et al.*, 2006; Staiger and Blanchoin, 2006),

which could facilitate spatiotemporal synchronization in the elongation of actin filaments and the actin fringe in conjunction with cell elongation and growth.

Hyperosmotic stress has been shown to induce increases in  $\text{Ins}(1,4,5)\text{P}_3$  in carrot suspension cells and *Arabidopsis* cultures, seedlings, and leaves (Drobak and Watkins, 2000; DeWald *et al.*, 2001; Takahashi *et al.*, 2001; Im *et al.*, 2007; Konig *et al.*, 2007) (Table 1). As discussed above, evidence is emerging that  $\text{Ins}(1,4,5)\text{P}_3$  is phosphorylated to  $\text{InsP}_4$ ,  $\text{InsP}_5$ , and  $\text{InsP}_6$ . Thus,  $\text{Ins}(3,4,5,6)\text{P}_4$  levels might increase with increasing  $\text{InsP}_5$  (because it is linked through a reversible phosphatase/kinase cascade), and this would inhibit anion efflux, consistent with the hydrodynamics model of pollen tube growth. Similarly, increased  $\text{InsP}_6$  might mobilize free  $\text{Ca}^{2+}$  that would affect ion channels and endocytosis.

## Ion fluxes in pollen tube growth

Ion flux across the plasma membrane to regulate cell osmotic potential and volume is postulated to be the most ancient signal transduction pathway that arose with the onset of cellular life, and became refined during the proliferation of cellular complexity (Martinac, 2004; Kung, 2005). Ion flux is the most rapid response to changes in osmotic potential across the plasma membrane in a wide variety of cell types from bacteria to eukaryotes and plants (Blatt, 2000; Schroeder *et al.*, 2001; White and Broadley, 2001; Pandey *et al.*, 2007; Martinac *et al.*, 2008; Hoffmann *et al.*, 2009) (Table 1). Ion flux functions as an osmotic pressure safety valve and to drive water into or out of the cell.

Ion fluxes ( $\text{Ca}^{2+}$ ,  $\text{K}^+$ ,  $\text{H}^+$ , and  $\text{Cl}^-$ ) have been intensively studied in pollen tubes, and they are crucial for growth (Holdaway-Clarke and Hepler, 2003). Growing pollen tubes have an intracellular free  $\text{Ca}^{2+}$  gradient that is highest in the apical dome, an acidic region at the tip, and an alkaline band near the subapex that corresponds to the location of the growth zone. In growing pollen tubes, cations ( $\text{Ca}^{2+}$ ,  $\text{K}^+$ , and  $\text{H}^+$ ) display net influx at the apex while  $\text{Cl}^-$  anion effluxes from the apex. During oscillatory growth, all ion fluxes oscillate with the same frequency as growth oscillations, but have phase shifts with respect to the growth cycle (Fig. 2). The intracellular  $\text{Ca}^{2+}$  gradient peaks after peak growth, with a phase shift of  $\sim 30^\circ$ . Maximum  $\text{Ca}^{2+}$  and  $\text{K}^+/\text{H}^+$  influxes at the apex occur after peak growth, with phase shifts of  $\sim 100^\circ$  and  $130^\circ$ , respectively. Anion efflux from the apex occurs in phase with growth. Disruption of  $\text{Ca}^{2+}$  or  $\text{Cl}^-$  fluxes leads to apical swelling and growth arrest (Holdaway-Clarke and Hepler, 2003; Breygina *et al.*, 2009). The new model considers that ion fluxes in pollen tubes are involved in regulating and responding to changes in cell hydrodynamics in the apical region, and are essential elements in regulatory volume decrease and regulatory volume increase (Zonia and Munnik, 2007, 2009).

Aside from their role in electrophysiology and cell osmotic potential, ions also interact with and potentially regulate a variety of cellular targets including the actin cytoskeleton, membrane transporters, protein kinases, small GTPases,

exocytosis and endocytosis, and cell wall pectins. A discussion of these results is beyond the scope of this review, and interested readers are referred to a previous review (Holdaway-Clarke and Hepler, 2003). The current review will briefly mention possible roles of ions in regulation of exocytosis and endocytosis. Earlier work demonstrated a role for  $\text{Ca}^{2+}$  in plant cell exocytosis (Zorec and Tester, 1992; Thiel and Battey, 1998; Battey *et al.*, 1999). Thus, the tip high  $\text{Ca}^{2+}$  gradient and  $\text{Ca}^{2+}$  influx at the tip suggested that  $\text{Ca}^{2+}$  is involved in regulating exocytosis at the tip. However, recent data indicate that smooth vesicle endocytosis occurs at the tip and exocytosis occurs in the subapex (Moscattelli *et al.*, 2007; Bove *et al.*, 2008; Zonia and Munnik, 2008a, b, 2009). In light of this, recent work on neurons may hold some clues. At axonal synaptic terminals,  $\text{Ca}^{2+}$  is involved in both exocytosis and endocytosis (He *et al.*, 2008; Idone *et al.*, 2008; Jackson and Chapman, 2008; Dittman and Ryan, 2009). High  $\text{Cl}^-$  levels selectively inhibit a form of endocytosis that is called ‘kiss-and-run’ exocytosis or flicker fusion (Smith *et al.*, 2008). The endocytosis rate appears to be linked to the rate of exocytosis, and these are sensitive to levels of  $\text{Ca}^{2+}$  and  $\text{Cl}^-$ . In tobacco pollen tubes, an integrated balance between rates of exocytosis, endocytosis, and growth is similarly observed during osmotic forcing of increased growth (hypo-osmosis) versus decreased growth (hyperosmosis) (Zonia and Munnik, 2008a) (Fig. 2). High  $\text{Cl}^-$  levels blocked tobacco pollen tube growth, but did not immediately block smooth vesicle endocytosis at the apex (Breygina *et al.*, 2009), suggesting that this endosomal pathway differs from the ‘kiss-and-run’ exocytosis/endocytosis pathway that has been suggested to occur at the pollen tube apex (Samaj *et al.*, 2006; Bove *et al.*, 2008).

## Small G-proteins in pollen tube growth: Rho/Rac

Small GTPases have crucial roles in pollen tube growth and have been the focus of intensive research (Nibau *et al.*, 2006; Samaj *et al.*, 2006; Yang and Fu, 2007; Kost, 2008; Lee and Yang, 2008; Nielsen *et al.*, 2008; Woollard and Moore, 2008; Yalovsky *et al.*, 2008). They have roles in mediating actin cytoskeletal reorganization,  $\text{Ca}^{2+}$  flux, reactive oxygen species, exocytosis, endocytosis and endosomal trafficking, and phospholipid signalling. An understanding of their exact function in these processes is complicated by the large number of upstream regulators, only a few of which have been identified to date—guanine nucleotide exchange factors (GEFs), GTPase-activating proteins (GAPs), and guanine nucleotide dissociation inhibitors (GDIs)—that are themselves subject to regulation by upstream signalling pathways. The current review is limited to brief mention of the role of Rho GTPases in endocytosis and potential regulation of small G-proteins by cell hydrodynamics.

ROP1 (Rho of plants) is localized along the plasma membrane in the apical dome of growing pollen tubes, and its activity appears to be high before the start of the growth

cycle (Fig. 2) (Lee *et al.*, 2008c). Because of this localization, and because the apex was thought to be the site of exocytosis, ROP1 was considered to function in mediating exocytosis. However, there is extensive evidence indicating Rho GTPase function in endocytosis and endocytic trafficking, as well as exocytosis (Ridley, 2001; Qualmann and Mellor, 2003). Recent work has shown that ectopic expression of activated Rho/Rac in *Arabidopsis* root hairs disrupts endocytic uptake of FM 4-64 (Bloch *et al.*, 2005; Yalovsky *et al.*, 2008). Another study shows that expression of constitutively active ROP in guard cells attenuates light-induced stomatal opening (Jeon *et al.*, 2008). Light-induced stomatal opening occurs by hydrodynamically driven swelling and increased exocytosis, while stomatal closure occurs by hydrodynamically driven shrinking and increased endocytosis. Thus, attenuation of stomatal opening by constitutively active ROP might be due to its activation of endocytosis and interference with exocytosis. Further work will be required to clarify the function of ROP1 in plant cells and in pollen tube growth.

Rho GTPase activity is rapidly increased after hypertonic cell shrinking in epithelial cells, and decreased in osmotically swollen cells (Hoffmann *et al.*, 2009). In *Arabidopsis* seedlings, salt and drought stress activated several family members of ROP-GEFs (Shin *et al.*, 2009). In tobacco pollen tubes, GFP-RIC4 (a ROP-interacting protein that activates ROP) accumulates at the plasma membrane along the apical dome before the start of the growth pulse (Hwang *et al.*, 2005), and this has been correlated with increased ROP activity (Yang and Fu, 2007; Lee and Yang, 2008). Further work will be required to investigate possible stimulation of ROP activity by hypertonic treatment or apical volume decrease.

## Fertilization and self-incompatibility

The first stage of pollen growth *in planta* is hydration and germination on the stigma. The last stage is arrival of the pollen tube at the embryo sac, penetration of the synergid cells, and rupture of the tip to discharge the sperm cells and effect fertilization. Both of these stages are critically dependent on cell hydrodynamics (Table 1). Lipids on the stigmatic surface (for species with wet and dry stigmas) and proteins in the pollen coat are required for controlling the directional flow of water to pollen to enable hydration, which is requisite for pollen tube germination and growth (Lush *et al.*, 1998; Wolters-Arts *et al.*, 1998; Updegraff *et al.*, 2009). Upon reaching the micropyle, the pollen tube ceases growth and the apical region undergoes a massive increase in volume and pressure that induces explosive bursting near the apex. Initial rates of discharged material are estimated to be of the order of  $10\,000\ \mu\text{m}^3\ \text{s}^{-1}$  during the first 0.1 s for *Torenia* pollen tubes (Higashiyama *et al.*, 2000).

Growth arrest and hydrodynamically induced ramping of pressure in the pollen tube apical region prior to sperm cell discharge are under control of both female and male genes. FERONIA encodes a receptor-like kinase expressed on the synergid cell surface, and upon reaching *feronialsirene*

embryo sacs pollen tubes continue growing and fail to discharge (Huck *et al.*, 2003; Rotman *et al.*, 2003; Escobar-Restrepo *et al.*, 2007). LORELEI encodes a putative glucosylphosphatidylinositol-anchored protein expressed in the synergid cells, and similar to *feronialsirene*, pollen tubes fail to cease growth and discharge upon reaching *lorelei* embryo sacs (Capron *et al.*, 2008). The pollen-expressed homologues of FERONIA (ANXUR1 and ANXUR2) have recently been identified in *Arabidopsis* (Boisson-Dernier *et al.*, 2009; Miyazaki *et al.*, 2009). ANXUR1/2 encode RLKs that localize to the pollen tube apical region, with significant accumulation in the subapex and near the apical dome. Single mutants lack negative effects on phenotype, but double mutants have severely swollen tubes and spontaneously discharge *in vitro*. However, double mutants germinate normally on the stigma and grow through the papillar cell layer, but most discharge in the style or between the stigma and style.

Self-incompatibility (SI) is a highly resource-intensive system that plants have developed to prevent inbreeding. Several families have invested in SI systems that specifically target pollen hydrodynamics (Nasrallah, 2005, and references therein). In self-incompatible members of the crucifer family (eg. *Brassica*, *Arabidopsis lyrata*) and in the grass family, SI blocks hydration of self-pollen grains within minutes after pollen arrival on the stigmatic surface, whereas non-self-pollen grains undergo hydration and increase cell volume by 2- to 3-fold (Dickinson, 1995). The SI response is triggered by interaction of the S-locus receptor kinase on the stigmatic surface with S-locus cysteine-rich proteins located in the pollen coat, functions to isolate self-pollen hydrodynamically, and enables single papillar cells simultaneously to accept non-self-pollen and reject self-pollen. The rejected pollen grains fail to hydrate and subsequently fail to germinate and form a pollen tube.

## Conclusions and perspectives

This review has proposed a spatiotemporal model of signalling networks regulating pollen tube growth that is integrated with apical volume oscillations and the hydrodynamic cycle (Fig. 2). Experimental data in pollen tubes and other plant cells show that cell hydrodynamics can activate and deactivate many key structural and signalling elements, including membrane trafficking, exocytosis and endocytosis, cell elongation and growth, ion flux, phospholipid and inositol polyphosphate signalling, and deposition and assembly of the apical pectin cell wall. Cell hydrodynamics has the potential to regulate other key elements including actin cytoskeletal organization and small GTPases. Future work will be directed to experimental investigation of these potential links.

## Acknowledgements

This work is supported by the Netherlands Organization for Scientific Research (NWO-ECHO 700.56.00).

## References

- Anderhag P, Hepler PK, Lazzaro MD.** 2000. Microtubules and microfilaments are both responsible for pollen tube elongation in the conifer *Picea abies* (Norway spruce). *Protoplasma* **214**, 141–157.
- Arisz SA, Testerink C, Munnik T.** 2009. Plant PA signaling via diacylglycerol kinase. *Biochimica et Biophysica Acta* **1791**, 869–875.
- Bader M-F, Vitale N.** 2009. Phospholipase D in calcium-regulated exocytosis: lessons from chromaffin cells. *Biochimica et Biophysica Acta* **1791**, 936–941.
- Bathey NH, James NC, Greenland AJ, Brownlee C.** 1999. Exocytosis and endocytosis. *The Plant Cell* **11**, 643–659.
- Bausch AR, Kroy K.** 2006. A bottom-up approach to cell mechanics. *Nature Physics* **2**, 231–238.
- Blatt MR.** 2000. Cellular signaling and volume control in stomatal movements in plants. *Annual Review of Cell and Developmental Biology* **16**, 221–241.
- Bloch D, Lavy M, Efrat Y, Efroni I, Bracha-Drori K, Abu-Abied M, Sadot E, Yalovsky S.** 2005. Ectopic expression of an activated RAC in *Arabidopsis* disrupts membrane cycling. *Molecular Biology of the Cell* **16**, 1913–1927.
- Boisson-Dernier A, Roy S, Kritsas K, Grobei MA, Jaciubek M, Schroeder JI, Grossniklaus U.** 2009. Disruption of the pollen-expressed FERONIA homologs ANXUR1 and ANXUR2 triggers pollen tube discharge. *Development* **136**, 3279–3288.
- Bosch M, Cheung AY, Hepler PK.** 2005. Pectin methylesterase, a regulator of pollen tube growth. *Plant Physiology* **138**, 1334–1346.
- Bosch M, Hepler PK.** 2005. Pectin methylesterases and pectin dynamics in pollen tubes. *The Plant Cell* **17**, 3219–3226.
- Bosch M, Hepler PK.** 2006. Silencing of the tobacco pollen pectin methylesterase NtPPME1 results in retarded *in vivo* pollen tube growth. *Planta* **223**, 736–745.
- Botelho RJ.** 2009. Changing phosphoinositides ‘on the fly’: how trafficking vesicles avoid an identity crisis. *BioEssays* **31**, 1127–1136.
- Bove J, Vaillancourt B, Kroeger J, Hepler PK, Wiseman PW, Geitmann A.** 2008. Magnitude and direction of vesicle dynamics in growing pollen tubes using spatiotemporal image correlation spectroscopy and fluorescence recovery after photobleaching. *Plant Physiology* **147**, 1646–1658.
- Brearley C.** 2008. Sorting out PtdIns(4,5)P<sub>2</sub> and clathrin-coated vesicles. *Biochemical Journal* **415**, e1–e3.
- Brearley C, Hanke DE.** 2000. Metabolic relations of inositol 3,4,5,6-tetrakisphosphate revealed by cell permeabilization. Identification of inositol 3,4,5,6-tetrakisphosphate 1-kinase and inositol 3,4,5,6-tetrakisphosphate phosphatase activities in mesophyll cells. *Plant Physiology* **122**, 1209–1216.
- Breygina MA, Matveeva NP, Ermakov IP.** 2009. The role of Cl<sup>-</sup> in pollen germination and tube growth. *Plant Developmental Biology* **39**, 157–164.
- Buitink J, Claessens MMAE, Hemminga MA, Hoekstra FA.** 1998. Influence of water content and temperature on molecular mobility and intracellular glasses in seeds and pollen. *Plant Physiology* **118**, 531–541.
- Buitink J, Dzuba SA, Hoekstra FA, Tsvetkov YD.** 2000. Pulsed EPR spin-probe study of intracellular glasses in seed and pollen. *Journal of Magnetic Resonance* **142**, 364–368.
- Cai G, Cresti M.** 2009. Organelle motility in the pollen tube: a tale of 20 years. *Journal of Experimental Botany* **60**, 495–508.
- Capron A, Gourgues M, Neiva LS, et al.** 2008. Maternal control of male-gamete delivery in *Arabidopsis* involves a putative GPI-anchored protein encoded by the LORELEI gene. *The Plant Cell* **20**, 3038–3049.
- Carpita NC, Gibeaut DM.** 1993. Structural models of primary cell walls in flowering plants: consistency of molecular structure with the physical properties of the walls during growth. *The Plant Journal* **3**, 1–30.
- Charras GT, Mitchison TJ, Mahadevan L.** 2009. Animal cell hydraulics. *Journal of Cell Science* **122**, 3233–3241.
- Charras GT, Yarrow JC, Horton MA, Mahadevan L, Mitchison TJ.** 2005. Non-equilibrium hydrostatic pressure in blebbing cells. *Nature* **435**, 365–369.
- Cheung AY, Duan Q-H, Costa SS, de Graaf B, Di Stilio VS, Feijo J, Wu H-M.** 2008. The dynamic pollen tube cytoskeleton: live cell studies using actin-binding and microtubule-binding reporter proteins. *Molecular Plant* **1**, 686–702.
- Cheung AY, Wu H-M.** 2008. Structural and signaling networks for the polar cell growth machinery in pollen tubes. *Annual Review of Plant Biology* **59**, 547–572.
- Cockcroft S.** 2009. Phosphatidic acid regulation of phosphatidylinositol 4-phosphate 5-kinases. *Biochimica et Biophysica Acta* **1791**, 905–912.
- Corson F, Hamant O, Bohn S, Traas J, Boudaoud A, Couder Y.** 2009. Turning a plant tissue into a living cell froth through isotropic growth. *Proceedings of the National Academy of Sciences, USA* **106**, 8453–8458.
- Cosgrove DJ.** 2005. Growth of the plant cell wall. *Nature Reviews Molecular and Cellular Biology* **6**, 850–861.
- Crowell EF, Bischoff V, Desprez T, Rolland A, Stierhof YD, Schumacher K, Gonneau M, Hofte H, Vernhettes S.** 2009. Pausing of Golgi bodies on microtubules regulates secretion of cellulose synthase complexes in *Arabidopsis*. *The Plant Cell* **21**, 1141–1154.
- DeWald DB, Torabinejad J, Jones CA, Shope JC, Cangelosi AR, Thompson JE, Prestwich GD, Hama H.** 2001. Rapid accumulation of phosphatidylinositol 4,5-bisphosphate and inositol 1,4,5-trisphosphate correlates with calcium mobilization in salt-stressed *Arabidopsis*. *Plant Physiology* **126**, 759–769.
- Dickinson H.** 1995. Dry stigmas, water and self-incompatibility in *Brassica*. *Sexual Plant Reproduction* **8**, 1–10.
- Dittman J, Ryan TA.** 2009. Molecular circuitry of endocytosis at nerve terminals. *Annual Review of Cell and Developmental Biology* **25**, 133–160.
- Donaldson JG.** 2009. Phospholipase D in endocytosis and endosomal recycling pathways. *Biochimica et Biophysica Acta* **1791**, 845–849.
- Dove SK, Dong K, Kobayashi T, Williams FK, Michell RH.** 2009. Phosphatidylinositol 3,5-bisphosphate and Fab1p/PIKfyve under PPII endo-lysosome function. *Biochemical Journal* **419**, 1–13.

- Dowd PE, Coursol S, Skirpan AL, Kao TH, Gilroy S.** 2006. Petunia phospholipase C1 is involved in pollen tube growth. *The Plant Cell* **18**, 1438–1453.
- Drobak BK, Watkins PA.** 2000. Inositol(1,4,5) trisphosphate production in plant cells: an early response to salinity and hyperosmotic stress. *FEBS Letters* **481**, 240–244.
- Einspahr KJ, Peeler TC, Thompson GA Jr.** 1988. Rapid changes in polyphosphoinositide metabolism associated with the response of *Dunaliella salina* to hypoosmotic shock. *Journal of Biological Chemistry* **263**, 5775–5779.
- Era A, Tominga M, Ebine K, Awai C, Saito C, Ishizaki K, Yamato KT, Kohchi T, Nakano A, Ueda T.** 2009. Application of Lifeact reveals F-actin dynamics in *Arabidopsis thaliana* and the liverwort *Marchantia polymorpha*. *Plant and Cell Physiology* **50**, 1041–1048.
- Escobar-Restrepo JM, Huck N, Kessler S, Gagliardini V, Gheyselinck J, Yang WC, Grossniklaus U.** 2007. The FERONIA receptor-like kinase mediates male–female interactions during pollen tube reception. *Science* **317**, 656–660.
- Foresti O, Denecke J.** 2008. Intermediate organelles of the plant secretory pathway: identity and function. *Traffic* **9**, 1599–1612.
- Franklin-Tong VE, Drobak BK, Allan AC, Watkins PAC, Trewavas AJ.** 1996. Growth of pollen tubes of *Papaver rhoeas* is regulated by a slow-moving calcium wave propagated by inositol 1,4,5-trisphosphate. *The Plant Cell* **8**, 1305–1321.
- Fu Y, Wu G, Yang Z.** 2001. ROP GTPase-dependent dynamics of tip-localized F-actin controls tip growth in pollen tubes. *Journal of Cell Biology* **152**, 1019–1032.
- Geisler DA, Sampathkumar A, Mutwil M, Persson S.** 2008. Laying down the bricks: logistic aspects of cell wall biosynthesis. *Current Opinion in Plant Biology* **11**, 647–652.
- Geitmann A, Snowman BN, Emons AMC, Franklin-Tong VE.** 2000. Alterations in the actin cytoskeleton of pollen tubes are induced by the self-incompatibility reaction in *Papaver rhoeas*. *The Plant Cell* **12**, 1239–1251.
- Grefen C, Blatt MR.** 2008. SNAREs—molecular governors in signaling and development. *Current Opinion in Plant Biology* **11**, 600–609.
- He Z, Fan J, Kang L, Lu J, Xue Y, Xu P, Xu T, Chen L.** 2008.  $\text{Ca}^{2+}$  triggers a novel clathrin-independent but actin-dependent fast endocytosis in pancreatic  $\beta$  cells. *Traffic* **9**, 910–923.
- Heilmann I.** 2009. Using genetic tools to understand plant phosphoinositide signaling. *Trends in Plant Science* **14**, 171–179.
- Helling D, Possart A, Cottier S, Klahre U, Kost B.** 2006. Pollen tube tip growth depends on plasma membrane polarization mediated by tobacco PLC3 activity and endocytic membrane recycling. *The Plant Cell* **18**, 3519–3534.
- Higashiyama T, Kuroiwa H, Kawano S, Kuroiwa T.** 2000. Explosive discharge of pollen tube contents in *Torenia foemieri*. *Plant Physiology* **122**, 11–13.
- Ho MWY, Kaetzel MA, Armstrong DL, Shears SB.** 2001. Regulation of a human chloride channel: a paradigm for integrating input from calcium, type II calmodulin-dependent protein kinase, and inositol 3,4,5,6-tetrakisphosphate. *Journal of Biological Chemistry* **276**, 18673–18680.
- Hoffmann EK, Lambert IH, Pedersen SF.** 2009. Physiology of cell volume regulation in vertebrates. *Physiological Reviews* **89**, 193–277.
- Holdaway-Clarke TL, Hepler PK.** 2003. Control of pollen tube growth: role of ion gradients and fluxes. *New Phytologist* **159**, 539–563.
- Huang S, Gao L, Blanchoin L, Staiger CJ.** 2006. Heterodimeric capping protein from *Arabidopsis* is regulated by phosphatidic acid. *Molecular Biology of the Cell* **17**, 1946–1958.
- Huck N, Moore JM, Federer M, Grossniklaus U.** 2003. The *Arabidopsis* mutant *feronia* disrupts the female gametophytic control of pollen tube reception. *Development* **130**, 2149–2159.
- Hussey PJ, Ketelaar T, Deeks MJ.** 2006. Control of the actin cytoskeleton in plant cell growth. *Annual Review of Plant Biology* **57**, 109–125.
- Hwang JU, Gu Y, Lee YJ, Yang Z.** 2005. Oscillatory ROP-GTPase activation leads the oscillatory polarized growth of pollen tubes. *Molecular Biology of the Cell* **16**, 5385–5399.
- Idone V, Tam C, Goss JW, Toomre D, Pypaert M, Andrews NW.** 2008. Repair of injured plasma membrane by rapid  $\text{Ca}^{2+}$ -dependent endocytosis. *Journal of Cell Biology* **180**, 905–914.
- Im YJ, Perera IY, Brglez I, Davis AJ, Stevenson-Paulik J, Phillippy BQ, Johannes E, Allen NS, Boss WF.** 2007. Increasing plasma membrane phosphatidylinositol(4,5)bisphosphate biosynthesis increases phosphoinositide metabolism in *Nicotiana tabacum*. *The Plant Cell* **19**, 1603–1616.
- Irvine RF.** 2003. 20 years of  $\text{Ins}(1,4,5)\text{P}_3$ , and 40 years before. *Nature Reviews Molecular Cell Biology* **4**, 586–590.
- Irvine RF, Schell MJ.** 2001. Back in the water: the return of the inositol phosphates. *Nature Reviews Molecular Cell Biology* **2**, 327–338.
- Ischebeck T, Stenzel I, Heilmann I.** 2008. Type B phosphatidylinositol-4-phosphate 5-kinases mediate *Arabidopsis* and *Nicotiana tabacum* pollen tube growth by regulating apical pectin secretion. *The Plant Cell* **20**, 3312–3330.
- Ives EB, Nichols J, Wentse SR, York JD.** 2000. Biochemical and functional characterization of inositol 1,3,4,5,6-pentakisphosphate 2-kinases. *Journal of Biological Chemistry* **275**, 36575–36583.
- Jackson MB, Chapman ER.** 2008. The fusion pores of  $\text{Ca}^{2+}$ -triggered exocytosis. *Nature Structural and Molecular Biology* **15**, 684–689.
- Jeon BW, Hwang J-U, Hwang Y, et al.** 2008. The *Arabidopsis* small G protein ROP2 is activated by light in guard cells and inhibits light-induced stomatal opening. *The Plant Cell* **20**, 75–87.
- Kooijman EE, Burger KNJ.** 2009. Biophysics and function of phosphatidic acid: a molecular perspective. *Biochimica et Biophysica Acta* **1791**, 881–888.
- Kooijman EE, Chupin V, de Kruijff B, Burger KNJ.** 2003. Modulation of membrane curvature by phosphatidic acid and lysophosphatidic acid. *Traffic* **4**, 162–174.
- Kooijman EE, Chupin V, Fuller NL, Kozlov MM, de Kruijff B, Burger KNJ, Rand PR.** 2005. Spontaneous curvature of phosphatidic acid and lysophosphatidic acid. *Biochemistry* **44**, 2097–2102.

- Kooijman EE, King KE, Gangoda M, Gericke A.** 2009. Ionization properties of phosphatidylinositol polyphosphates in mixed model membranes. *Biochemistry* **48**, 9360–9371.
- Kooijman EE, Tieleman DP, Testerink C, Munnik T, Rijkers DTS, Burger KNJ, de Kruijff B.** 2007. An electrostatic/hydrogen bond switch as the basis for the specific interaction of phosphatidic acid with proteins. *Journal of Biological Chemistry* **282**, 11356–11364.
- Konig S, Ischebeck T, Lerche J, Stenzel I, Heilmann I.** 2008. Salt-stress-induced association of phosphatidylinositol 4,5-bisphosphate with clathrin-coated vesicles. *Biochemical Journal* **415**, 387–399.
- Konig S, Mosblech A, Heilmann I.** 2007. Stress-inducible and constitutive phosphoinositide pools have distinctive fatty acid patterns in *Arabidopsis thaliana*. *FASEB Journal* **21**, 1958–1967.
- Kost B.** 2008. Spatial control of Rho (Rac-Rop) signaling in tip-growing plant cells. *Trends in Cell Biology* **18**, 119–127.
- Kost B, Lemichez E, Spielhofer P, Hong Y, Toliás K, Carpenter C, Chua N-H.** 1999. Rac homologues and compartmentalized phosphatidylinositol 4,5-bisphosphate act in a common pathway to regulate polar pollen tube growth. *Journal of Cell Biology* **145**, 317–330.
- Kroh M, Knuiman B.** 1985. Exocytosis in non-plasmolyzed and plasmolyzed tobacco pollen tubes. *Planta* **166**, 287–299.
- Kung C.** 2005. A possible unifying principle for mechanosensation. *Nature* **436**, 647–654.
- Lam SK, Tse YC, Robinson DG, Jiang L.** 2007. Tracking down the elusive early endosome. *Trends in Plant Science* **12**, 497–505.
- Langridge PD, Kay RR.** 2006. Blebbing of *Dictyostelium* cells in response to chemoattractant. *Experimental Cell Research* **312**, 2009–2017.
- Lazzaro MD, Donohue JM, Soodavar FM.** 2003. Disruption of cellulose synthesis by isoxaben causes tip swelling and disorganizes cortical microtubules in elongating conifer pollen tubes. *Protoplasma* **220**, 201–207.
- Lee Y, Bak G, Choi Y, Chuang WI, Cho HT, Lee Y.** 2008a. Roles of phosphatidylinositol 3-kinase in root hair growth. *Plant Physiology* **147**, 624–635.
- Lee Y, Kim ES, Choi Y, Hwang I, Staiger CJ, Chung YY, Lee Y.** 2008b. The *Arabidopsis* phosphatidylinositol 3-kinase is important for pollen development. *Plant Physiology* **147**, 1886–1897.
- Lee YJ, Szumlanski A, Nielsen E, Yang Z.** 2008c. Rho GTPase-dependent filamentous actin dynamics coordinate vesicle targeting and exocytosis during tip growth. *Journal of Cell Biology* **181**, 1155–1168.
- Lee YJ, Yang Z.** 2008. Tip growth: signaling in the apical dome. *Current Opinion in Plant Biology* **11**, 662–671.
- Lemtiri-Chlieh F, MacRobbie EAC, Brearley CA.** 2000. Inositol hexakisphosphate is a physiological signal regulating the K<sup>+</sup>-inward rectifying conductance in guard cells. *Proceedings of the National Academy of Sciences, USA* **97**, 8687–8692.
- Lemtiri-Chlieh F, MacRobbie EAC, Webb AAR, Manison NF, Brownlee C, Skepper JN, Chen J, Prestwisch GD, Brearley CA.** 2003. Inositol hexakisphosphate mobilizes an endomembrane store of calcium in guard cells. *Proceedings of the National Academy of Sciences, USA* **100**, 10091–10095.
- Li M, Hong Y, Wang X.** 2009. Phospholipase D- and phosphatidic acid-mediated signaling in plants. *Biochimica et Biophysica Acta* **1791**, 927–935.
- Lloyd C, Chan J.** 2008. The parallel lives of microtubules and cellulose microfibrils. *Current Opinion in Plant Biology* **11**, 641–646.
- Lovy-Wheeler A, Cardenas L, Kunkel JG, Hepler PK.** 2007. Differential organelle movement on the actin cytoskeleton in lily pollen tubes. *Cell Motility and the Cytoskeleton* **64**, 217–232.
- Lovy-Wheeler A, Wilsen KL, Baskin TI, Hepler PK.** 2005. Enhanced fixation reveals an apical cortical fringe of actin filaments as a consistent feature of the pollen tube. *Planta* **221**, 95–104.
- Lush WM, Grieser F, Wolters-Arts M.** 1998. Directional guidance of *Nicotiana glauca* pollen tubes *in vitro* and on the stigma. *Plant Physiology* **118**, 733–741.
- Mahadevan L.** 2008. Polymer science and biology: structure and dynamics at multiple scales. *Faraday Discussions* **139**, 9–19.
- Malho R.** 1998. Role of 1,4,5-inositol triphosphate-induced Ca<sup>2+</sup> release in pollen tube orientation. *Sexual Plant Reproduction* **11**, 231–235.
- Martin O, Penate L, Alvare A, Cardenas R, Horvath JE.** 2009. Some possible dynamical constraints for life's origin. *Origin of Life and Evolution of Biosphere* **39**, 533–544.
- Martinac B.** 2004. Mechanosensitive ion channels: molecules of mechanotransduction. *Journal of Cell Science* **117**, 2449–2460.
- Martinac B, Saimi Y, Kung C.** 2008. Ion channels in microbes. *Physiological Review* **88**, 1449–1490.
- McKenna ST, Kunkel JG, Bosch M, Rounds CM, Vidali L, Winship LJ, Hepler PK.** 2009. Exocytosis precedes and predicts the increase in growth in oscillating pollen tubes. *The Plant Cell* **21**, 3026–3040.
- Meijer HJ, Munnik T.** 2003. Phospholipid-based signaling in plants. *Annual Review of Plant Biology* **54**, 265–306.
- Michell RH, Heath VL, Lemmon MA, Dove SK.** 2006. Phosphatidylinositol 3,5-bisphosphate: metabolism and cellular functions. *Trends in Biochemical Sciences* **31**, 52–63.
- Mitchell J, Wang X, Zhang G, Gentzsch M, Nelson DJ, Shears SB.** 2008. An expanded biological repertoire for Ins(3,4,5,6)P<sub>4</sub> through its modulation of ClC-3 function. *Current Biology* **18**, 1600–1605.
- Mitchison TJ, Charras GT, Mahadevan L.** 2008. Implications of a poroelastic cytoplasm for the dynamics of animal cell shape. *Seminars in Cell and Developmental Biology* **19**, 215–223.
- Miyazaki S, Murata T, Sakurai-Ozato N, Kubo M, Demura T, Fukuda H, Hasebe M.** 2009. ANXUR1 and 2, sister genes to FERONIA/SIRENE, are male factors for coordinated fertilization. *Current Biology* **19**, 1327–1331.
- Monteiro D, Castanho Coelho P, Rodrigues C, Camacho L, Quader H, Malho R.** 2005a. Modulation of endocytosis in pollen tube growth by phosphoinositides and phospholipids. *Protoplasma* **226**, 31–38.
- Monteiro D, Liu Q, Lisboa S, Scherer GEF, Quader H, Malho R.** 2005b. Phosphoinositides and phosphatidic acid regulate pollen tube growth and reorientation through modulation of [Ca<sup>2+</sup>]<sub>c</sub> and membrane secretion. *Journal of Experimental Botany* **56**, 1665–1674.



- Moscatelli A, Ciampolini F, Rodigheiro S, Onelli E, Cresti M, Santo N, Idilli A.** 2007. Distinct endocytosis pathways identified in tobacco pollen tubes using charged nanogold. *Journal of Cell Science* **120**, 3804–3819.
- Moscatelli A, Idilli AI.** 2009. Pollen tube growth: a delicate equilibrium between secretory and endocytic pathways. *Journal of Integrative Plant Biology* **51**, 727–739.
- Mueller-Roeber B, Pical C.** 2002. Inositol phospholipid metabolism in *Arabidopsis*: characterized and putative isoforms of inositol phospholipid kinase and phosphoinositide-specific phospholipase C. *Plant Physiology* **130**, 22–46.
- Munnik T, Testerink C.** 2009. Plant phosphoinositide signaling: 'in a nutshell'. *Journal of Lipid Research* **50**, S260–S265.
- Munnik T, Vermeer JEM.** 2010. Osmotic stress-induced phosphoinositide and inositol phosphate signalling in plants. *Plant, Cell and Environment* **33**, 655–669.
- Nasrallah JB.** 2005. Recognition and rejection of self in plant self-incompatibility: comparisons to animal histocompatibility. *Trends in Immunology* **26**, 412–418.
- Nibau C, Wu HM, Cheung AY.** 2006. RAC/ROP GTPases: 'hubs' for signal integration and diversification in plants. *Trends in Plant Science* **11**, 309–315.
- Nielsen E, Cheung AY, Ueda T.** 2008. The regulatory RAB and ARF GTPases for vesicular trafficking. *Plant Physiology* **147**, 1516–1526.
- Oprins JC, van der Burg C, Meijer HP, Munnik T, Groot JA.** 2001. PLD pathway involved in carbachol-induced Cl<sup>-</sup> secretion: possible role of TNF- $\alpha$ . *American Journal of Physiology Cell Physiology* **280**, C789–C795.
- Oprins JC, van der Burg C, Meijer HP, Munnik T, Groot JA.** 2002. Tumor necrosis factor alpha potentiates ion secretion induced by histamine in a human intestinal epithelial cell line and in mouse colon: involvement of the phospholipase D pathway. *Gut* **50**, 314–321.
- Pandey S, Zhang W, Assmann SM.** 2007. Roles of ion channels and transporters in guard cell signal transduction. *FEBS Letters* **581**, 2325–2336.
- Parre E, Geitmann A.** 2005. Pectin and the role of the physical properties of the cell wall in pollen tube growth of *Solanum chacoense*. *Planta* **220**, 582–592.
- Pelloux J, Rusterucci C, Mellerowicz EJ.** 2007. New insights into pectin methyl-esterase structure and function. *Trends in Plant Science* **12**, 267–277.
- Perera NM, Michell RH, Dove SK.** 2004. Hypo-osmotic stress activates Plc1p-dependent phosphatidylinositol 4,5-bisphosphate hydrolysis and inositol hexakisphosphate accumulation in yeast. *Journal of Biological Chemistry* **279**, 5216–5226.
- Pical C, Westergren T, Dove SK, Larsson C, Sommarin M.** 1999. Salinity and hyperosmotic stress induce rapid increases in phosphatidylinositol 4,5-bisphosphate, diacylglycerol pyrophosphate, and phosphatidylcholine in *Arabidopsis thaliana* cells. *Journal of Biological Chemistry* **274**, 38232–38240.
- Potma EO, de Boeij WP, van Haastert PJM, Wiersma DA.** 2001a. Real-time visualization of intracellular hydrodynamics in single living cells. *Proceedings of the National Academy of Sciences, USA* **98**, 1577–1582.
- Potma EO, de Boeij WP, Wiersma DA.** 2001b. Femtosecond dynamics of intracellular water probed with nonlinear optical Kerr effect microspectroscopy. *Biophysical Journal* **80**, 3019–3024.
- Proseus TE, Boyer JS.** 2005. Turgor pressure moves polysaccharides into growing cell walls of *Chara corallina*. *Annals of Botany* **95**, 967–976.
- Proseus TE, Boyer JS.** 2006. Periplasm turgor pressure controls wall deposition and assembly in growing *Chara corallina* cells. *Annals of Botany* **98**, 93–105.
- Qualmann B, Mellor H.** 2003. Regulation of endocytic traffic by Rho GTPases. *Biochemical Journal* **371**, 233–241.
- Richter S, Voss U, Jurgens G.** 2009. Post-Golgi traffic in plants. *Traffic* **10**, 819–828.
- Ridley AJ.** 2001. Rho proteins: linking signaling with membrane trafficking. *Traffic* **2**, 303–310.
- Rockel N, Wolf S, Kost B, Rausch T, Greiner S.** 2008. Elaborate spatial patterning of cell-wall PME and PME1 at the pollen tube tip involves PME1 endocytosis, and reflects the distribution of esterified and de-esterified pectins. *The Plant Journal* **53**, 133–143.
- Romagnoli S, Cai G, Cresti M.** 2003. *In vitro* assays demonstrate that pollen tube organelles use kinesin-related motor proteins to move along microtubules. *The Plant Cell* **15**, 251–269.
- Romagnoli S, Cai G, Faleri C, Yokota E, Shimmen T, Cresti M.** 2007. Microtubule- and actin-dependent motors are distributed on pollen tube mitochondria and contribute differently to their movement. *Plant and Cell Physiology* **48**, 345–361.
- Rotman N, Rozier F, Boavida L, Dumas C, Berger F, Faure JE.** 2003. Female control of male gametophyte delivery during fertilization in *Arabidopsis thaliana*. *Current Biology* **13**, 432–436.
- Rudge AS, Wakelam MJO.** 2009. Inter-regulatory dynamics of phospholipase D and the actin cytoskeleton. *Biochimica et Biophysica Acta* **1791**, 856–861.
- Rudolf MT, Dinkel C, Traynor-Kaplan AE, Schultz C.** 2003. Antagonists of myo-inositol 3,4,5,6-tetrakisphosphate allow repeated epithelial chloride secretion. *Bioorganic and Medicinal Chemistry* **11**, 3315–3329.
- Samaj J, Muller J, Beck M, Bohm N, Menzel D.** 2006. Vesicular trafficking, cytoskeleton and signaling in root hairs and pollen tubes. *Trends in Plant Science* **11**, 594–600.
- Schroeder JI, Allen GJ, Hugouvieux V, Kwak JM, Warner D.** 2001. Guard cell signal transduction. *Annual Review of Plant Physiology and Plant Molecular Biology* **52**, 627–658.
- Shabala S, Babourina O, Newman I.** 2000. Ion-specific mechanisms of osmoregulation in bean mesophyll cells. *Journal of Experimental Botany* **51**, 1243–1253.
- Shears SB.** 1998. The versatility of inositol phosphates as cellular signals. *Biochimica et Biophysica Acta* **1436**, 49–67.
- Shin DH, Kim T-L, Kwon Y-K, Cho M-H, Yoo J, Jeon J-S, Hahn T-R, Bhoo SH.** 2009. Characterization of *Arabidopsis* RopGEF family genes in response to abiotic stresses. *Plant Biotechnology Reports* **3**, 183–190.

- Smith LG, Oppenheimer DG.** 2005. Spatial control of cell expansion by the plant cytoskeleton. *Annual Review of Cell and Developmental Biology* **21**, 271–295.
- Smith SM, Renden R, von Gersdorff H.** 2008. Synaptic vesicle endocytosis: fast and slow modes of membrane retrieval. *Trends in Neurosciences* **31**, 559–568.
- Sousa E, Kost B, Malho R.** 2008. *Arabidopsis* phosphatidylinositol-4-monophosphate 5-kinase4 regulates pollen tube growth and polarity by modulating membrane recycling. *The Plant Cell* **20**, 3050–3064.
- Spagnoli C, Beyder A, Besch S, Sachs F.** 2008. Atomic force microscopy analysis of cell volume regulation. *Physical Review E* **78**, 0319161–0319166.
- Spitzer JJ, Poolman B.** 2005. Electrochemical structure of the crowded cytoplasm. *Trends in Biochemical Sciences* **30**, 536–541.
- Staiger CJ.** 2000. Signaling to the actin cytoskeleton in plants. *Annual Review of Plant Physiology and Plant Molecular Biology* **51**, 257–288.
- Staiger CJ, Blanchoin L.** 2006. Actin dynamics: old friends with new stories. *Current Opinion in Plant Biology* **9**, 554–562.
- Szymanski DB, Cosgrove DJ.** 2009. Dynamic coordination of cytoskeletal and cell wall systems during plant cell morphogenesis. *Current Biology* **19**, R800–R811.
- Takahashi S, Katagiri T, Hirayama T, Yamaguchi-Shinozaki K, Shinozaki K.** 2001. Hyperosmotic stress induces a rapid and transient increase in inositol 1,4,5-trisphosphate independent of abscisic acid in *Arabidopsis* cell culture. *Plant and Cell Physiology* **42**, 214–222.
- Taylor LP, Hepler PK.** 1997. Pollen germination and tube growth. *Annual Review of Plant Physiology and Plant Molecular Biology* **48**, 461–491.
- Teodoro AE, Zingarelli L, Lado P.** 1998. Early changes in Cl<sup>-</sup> efflux and H<sup>+</sup> extrusion induced by osmotic stress in *Arabidopsis thaliana* cells. *Physiologia Plantarum* **102**, 29–37.
- Testerink C, Munnik T.** 2005. Phosphatidic acid: a multifunctional stress signaling lipid in plants. *Trends in Plant Science* **10**, 368–375.
- Thiel G, Battey N.** 1998. Exocytosis in plants. *Plant Molecular Biology* **38**, 111–125.
- Thole JM, Nielsen E.** 2008. Phosphoinositides in plants: novel functions in membrane trafficking. *Current Opinion in Plant Biology* **11**, 620–631.
- Tomassen SFB, van der Wijk T, de Jong HR, Tilly BC.** 2004. Activation of phospholipase D by osmotic cell swelling. *FEBS Letters* **566**, 287–290.
- Trepas X, Deng L, An SS, Navajas D, Tschumperlin DJ, Gerthoffer WT, Butler JP, Fredberg JJ.** 2007. Universal physical responses to stretch in the living cell. *Nature* **447**, 592–595.
- Updegraff EP, Zhao F, Preuss D.** 2009. The extracellular lipase EXL4 is required for efficient hydration of *Arabidopsis* pollen. *Sexual Plant Reproduction* **22**, 197–204.
- Vajanaphanich M, Kachintorn U, Barrett KE, Cohn JA, Dharmasathaphom K, Traynor-Kaplan A.** 1993. Phosphatidic acid modulates Cl<sup>-</sup> secretion in T84 cells: varying effects depending on mode of stimulation. *American Journal of Physiology Cell Physiology* **264**, C1210–C1218.
- Vermeer JEM, Thole JM, Goedhart J, Nielsen E, Munnik T, Gadella TWJ Jr.** 2009. Imaging phosphatidylinositol 4-phosphate dynamics in living plant cells. *The Plant Journal* **57**, 356–372.
- Vermeer JEM, van Leeuwen W, Tobena-Santamarie R, Laxalt AM, Jones DR, Divecha N, Gadella TWJ Jr, Munnik T.** 2006. Visualization of PtdIns3P dynamics in living plant cells. *The Plant Journal* **47**, 687–700.
- Vidali L, McKenna ST, Hepler PK.** 2001. Actin polymerization is essential for pollen tube growth. *Molecular Biology of the Cell* **12**, 2534–2545.
- Vidali L, Rounds CM, Hepler PK, Bezanilla M.** 2009. Lefeat-mEGFP reveals a dynamic apical F-actin network in tip growing plant cells. *PLoS One* **4**, e5744/1–e5744/15.
- Wang X.** 2004. Lipid signaling. *Current Opinion in Plant Biology* **7**, 329–336.
- Wasteneys GO, Galway ME.** 2003. Remodeling the cytoskeleton for growth and form: an overview with some new views. *Annual Review of Plant Molecular Biology* **54**, 691–722.
- Welters P, Takegawa K, Emr SD, Chrispeels MJ.** 1994. AtVPS34, a phosphatidylinositol 3-kinase of *Arabidopsis thaliana*, is an essential protein with homology to a calcium-dependent lipid binding domain. *Proceedings of the National Academy of Sciences, USA* **91**, 11398–11402.
- White PJ, Broadley MR.** 2001. Chloride in soils and its uptake and movement within the plant: a review. *Annals of Botany* **88**, 967–988.
- Whitley P, Hinz S, Doughty J.** 2009. *Arabidopsis* FAB1/PIKfyve proteins are essential for development of viable pollen. *Plant Physiology* **151**, 1812–1822.
- Woollard AAD, Moore I.** 2008. The functions of Rab GTPases in plant membrane traffic. *Current Opinion in Plant Biology* **11**, 610–619.
- Wolters-Arts M, Lush WM, Mariani C.** 1998. Lipids are required for directional pollen tube growth. *Nature* **392**, 818–821.
- Xu J, Brearley CA, Lin W-H, Wang Y, Ye R, Mueller-Roeber B, Xu Z-H, Xue H-W.** 2005. A role of *Arabidopsis* inositol polyphosphate kinase, AtIPK2 $\alpha$ , in pollen germination and root growth. *Plant Physiology* **137**, 94–103.
- Xue H-W, Chen X, Mei Y.** 2009. Function and regulation of phospholipid signaling in plants. *Biochemical Journal* **421**, 145–156.
- Yalovsky S, Bloch D, Sorek N, Kost B.** 2008. Regulation of membrane trafficking, cytoskeleton dynamics, and cell polarity by ROP/RAC GTPases. *Plant Physiology* **147**, 1527–1543.
- Yang Z, Fu Y.** 2007. ROP/RAC GTPase signaling. *Current Opinion in Plant Biology* **10**, 490–494.
- York JD.** 2006. Regulation of nuclear processes by inositol polyphosphates. *Biochimica et Biophysica Acta* **1761**, 552–559.
- York JD, Odom AR, Murphy R, Ives EB, Wentz SR.** 1999. A phospholipase C-dependent inositol polyphosphate kinase pathway required for efficient messenger RNA export. *Science* **285**, 96–100.
- Zerzour R, Kroeger J, Geitmann A.** 2009. Polar growth in pollen tubes is associated with spatially confined dynamic changes in cell mechanical properties. *Developmental Biology* **334**, 437–446.

- Zhou EH, Trepas X, Park CY, Lenormand G, Oliver MN, Mijailovich SM, Hardin C, Weitz DA, Butler JP, Fredberg JJ.** 2009. Universal behavior of the osmotically compressed cell and its analogy to the colloidal glass transition. *Proceedings of the National Academy of Sciences, USA* **106**, 10632–10637.
- Zonia L, Cordeiro S, Tupy J, Feijo J.** 2002. Oscillatory chloride efflux at the pollen tube apex has a role in growth and cell volume regulation and is targeted by inositol 3,4,5,6-tetrakisphosphate. *The Plant Cell* **14**, 2233–2249.
- Zonia L, Müller M, Munnik T.** 2006. Hydrodynamics and cell volume oscillations in the pollen tube apical region are integral components of the biomechanics of *Nicotiana tabacum* pollen tube growth. *Cell Biochemistry and Biophysics* **46**, 209–232.
- Zonia L, Munnik T.** 2004. Osmotically induced cell swelling versus cell shrinking elicits specific changes in phospholipid signals in tobacco pollen tubes. *Plant Physiology* **134**, 813–823.
- Zonia L, Munnik T.** 2006. Cracking the green paradigm: functional coding of phosphoinositide signals in plant stress responses. *Subcellular Biochemistry* **39**, 207–237.
- Zonia L, Munnik T.** 2007. Life under pressure: hydrostatic pressure in cell growth and function. *Trends in Plant Science* **12**, 90–97.
- Zonia L, Munnik T.** 2008a. Vesicle trafficking dynamics and visualization of zones of exocytosis and endocytosis in tobacco pollen tubes. *Journal of Experimental Botany* **59**, 861–873.
- Zonia L, Munnik T.** 2008b. Still life: pollen tube growth observed in millisecond resolution. *Plant Signalling and Behavior* **3**, 836–838.
- Zonia L, Munnik T.** 2009. Uncovering hidden treasures in pollen tube growth mechanics. *Trends in Plant Science* **14**, 318–327.
- Zorec R, Tester M.** 1992. Cytoplasmic calcium stimulates exocytosis in a plant secretory cell. *Biophysical Journal* **63**, 864–867.
